# Supplementary material for: Cobalt(ii)-catalyzed remote C5-selective C–H sulfonylation of quinolines via insertion of sulfur dioxide
Source: Royal Society of Chemistry journal article supplement (doi:10.1039/c7ra11363c), 2017-01-01

# **Cobalt(II)-Catalyzed Remote C5-Selective C-H Sulfonylation of Quinolines via Insertion of Sulfur Dioxide**

Kai Wang, Guodong Wang, Guiyun Duan and Chengcai Xia\*

Pharmacy College, Taishan Medical University, Taian 271016 (China).

E-mail: [xiachc@163.com](mailto:xiachc@163.com)

## **Supporting Information**

### **Table of contents**

|                                                                         |    |
|-------------------------------------------------------------------------|----|
| 1. General Information                                                  | 2  |
| 2. Experimental Section                                                 | 2  |
| 3. Screening of reaction conditions for sulfonylation                   | 4  |
| 4. Characterization of the products                                     | 5  |
| 5. Investigation into the mechanism of reaction                         | 15 |
| 6. X-ray Crystal Data for <b>3f</b>                                     | 17 |
| 7. Copies of $^1\text{H}$ and $^{13}\text{C}\{^1\text{H}\}$ NMR Spectra | 18 |

## 1. General Information

All the chemicals were obtained commercially and used without any prior purification. All products were isolated by short chromatography on a silica gel (200-300 mesh) column using petroleum ether (60-90°C) and ethyl acetate.  $^1\text{H}$  and  $^{13}\text{C}\{^1\text{H}\}$  NMR spectra were recorded on a Bruker Advance 500 spectrometer at ambient temperature with  $\text{CDCl}_3$  as solvent and tetramethylsilane (TMS) as the internal standard. The small-angle X-ray diffraction (SAXRD) data was taken on a German Bruker D4 X-ray diffractometer. Analytical thin layer chromatography (TLC) was performed on Merk precoated TLC (silica gel 60 F254) plates.

## 2. Experimental Section

### General procedure for the preparation of aryl diazonium tetrafluoroborates

The appropriate aniline (10.0 mmol) was dissolved in a mixture of 4.0 mL of distilled water and 3.4 mL of 50% hydrofluoroboric acid. After the reaction mixture was cooling to 0 °C using ice bath and the sodium nitrite (690 mg in 1.5 mL  $\text{H}_2\text{O}$ ) was added dropwise in 5 min interval of time. The resulting mixture was stirred for 40 min and the precipitate was collected by filtration and re-dissolved in minimum amount of acetone. Diethyl ether was added until precipitation of diazonium tetrafluoroborate, it was filtered and washed with diethyl ether and dried under vacuum.

### General procedure for the synthesis of compounds **3**

A mixture of **1** (49.6 mg, 0.2 mmol), DABCO•( $\text{SO}_2$ )<sub>2</sub> (57.6 mg, 1.2 eq.), **2** (1.2 eq.),  $\text{Co}(\text{acac})_2$  (5.0 mg, 10 mol%) in 1,2-dichloroethane (1.0 mL) was stirred at 50 °C under  $\text{N}_2$  atmosphere for 12 h. Then the mixture was cooled to room temperature and poured into water (5.0 mL), extracted with EtOAc (5.0 mL x 3), dried with  $\text{Na}_2\text{SO}_4$ , and the solvent was removed under reduced pressure. The products **3** were purified by flash column chromatography using PE/AcOEt as an eluent.

### General procedure for gram-scale synthesis of compound **3a**

A mixture of **1a** (1.2 g, 5.0 mmol), DABCO•( $\text{SO}_2$ )<sub>2</sub> (1.4 g, 1.2 eq.), **2a** (1.2 g, 1.2 eq.),  $\text{Co}(\text{acac})_2$  (129.0 mg, 10 mol%) in 1,2-dichloroethane (20.0 mL) was stirred at 50 °C under  $\text{N}_2$  atmosphere for 12 h. Then the mixture was cooled to room temperature and poured into water (100.0 mL), extracted with EtOAc (50.0 mL x 3), dried with  $\text{Na}_2\text{SO}_4$ , and the solvent was removed under reduced pressure. The products **3a** were

purified by flash column chromatography using PE/AcOEt as an eluent.

#### **General procedure for synthesis of compounds 4a**

A mixture of **3a** (402 mg, 1.0 mmol), concentrated hydrochloric acid (2.5 mL) and EtOH (5.0 mL) was stirred at 100 °C for 12 h. After completion, the mixture was cooled to room temperature and neutralized with NaOH aqueous solution. Then extracted with EtOAc (10.0 mL). The collected organic layer was washed with brine (10.0 mL), dried with MgSO<sub>4</sub>, and filtered through a pad of Celite gradually. The solvent was removed under reduced pressure, and the gathered residue was then purified by silica gel column chromatography using PE/AcOEt as an eluent.

#### **General procedure for the synthesis of compounds 3 by using anilines as the starting materials**

*t*BuONO (0.48 mmol) was added dropwise to a solution of arylamine **5** (0.4 mmol) and BF<sub>3</sub> • Et<sub>2</sub>O (0.36 mmol) in 1,2-dichloroethane (1.0 mL) under 0 °C. After 10 min, the above mixture was added to a solution of quinoline amides **1** (0.2 mmol), Co(acac)<sub>2</sub> (5.0 mg, 10 mol%) and DABCO•(SO<sub>2</sub>)<sub>2</sub> (57.6 mg, 0.24 mmol) in 1,2-dichloroethane (1.0 mL) under N<sub>2</sub> protection. The reaction was heated to 50 °C for 12 h. Then the mixture was cooled to room temperature and poured into water (5.0 mL), extracted with EtOAc (5.0 mL x 3), dried with Na<sub>2</sub>SO<sub>4</sub>, and the solvent was removed under reduced pressure. The products **3** were purified by flash column chromatography using PE/AcOEt as an eluent.

#### **General procedure for synthesis of compounds 1a-D2**

To a 50 mL schlenk tube with 8-aminoquinoline (288.0 mg, 2.0 mmol) was added conc. DCl in D<sub>2</sub>O (1 equiv, 2.0 mL). Then the tube was capped and sealed. Upon completion of the reaction for 12 h at 150 °C, the mixture was cooled to room temperature and diluted with water (25 mL). After extracting with EtOAc (10 mL x 3), the combined organic layer was gradually washed with 1 M NaHCO<sub>3</sub> aqueous solution (3 x 15 mL) and brine (50 mL), dried with Na<sub>2</sub>SO<sub>4</sub>, and filtered through a pad of Celite. The solvent was removed under reduced pressure to afford the deuterated 8-aminoquinoline. Note that the deuterated 8-aminoquinoline was used without any purification in the following step.

To a 100 mL single-neck flask charged with CH<sub>2</sub>Cl<sub>2</sub> (6 mL) were added deuterated 8-

aminoquinoline (2 mmol) and triethylamine (3 mmol). After stirring at room temperature for 5 min, the reaction solution was cooled in an ice bath. Benzoyl chloride (2.1 mmol) was added dropwise. Then the reaction solution was stirred overnight to improve the yield. The mixture was filtered through a pad of Celite, and the residue was washed with  $\text{CH}_2\text{Cl}_2$  (5 mL) subsequently. The collected  $\text{CH}_2\text{Cl}_2$  solution was washed with 1 M  $\text{NaHCO}_3$  aqueous solution for three times. After that, the organic layer was collected and dried over  $\text{Na}_2\text{SO}_4$ . The solvent was removed by rotary-evaporation. The raw product was then purified by silica gel column with a mixture solvent of PE/EtOAc (v/v; 20:1) as the eluent.

### 3. Screening of reaction conditions for sulfonylation<sup>a</sup>

$\text{1a} + \text{DABCO} \cdot (\text{SO}_2)_2 + \text{2a} \xrightarrow[\text{solvent, T}]{\text{Catalyst, additive,}} \text{3a}$

| Entry           | Catalyst                    | Additive                        | Solvent    | Yield [%] <sup>b</sup>    |
|-----------------|-----------------------------|---------------------------------|------------|---------------------------|
| 1               | Cu(OTf) <sub>2</sub>        | Na <sub>2</sub> CO <sub>3</sub> | DCE        | 31                        |
| 2               | Cu(acac) <sub>2</sub>       | Na <sub>2</sub> CO <sub>3</sub> | DCE        | 69                        |
| 3               | -                           | Na <sub>2</sub> CO <sub>3</sub> | DCE        | 0                         |
| 4               | Cu(acac) <sub>2</sub>       | K <sub>2</sub> CO <sub>3</sub>  | DCE        | 62                        |
| 5               | Cu(acac) <sub>2</sub>       | NaHCO <sub>3</sub>              | DCE        | 65                        |
| 6               | Cu(acac) <sub>2</sub>       | <i>t</i> -BuOK                  | DCE        | trace                     |
| 7               | Cu(acac) <sub>2</sub>       | AcOH                            | DCE        | 50                        |
| <b>8</b>        | <b>Cu(acac)<sub>2</sub></b> | -                               | <b>DCE</b> | <b>83(40)<sup>c</sup></b> |
| 9               | Cu(acac) <sub>2</sub>       | -                               | dioxane    | 41                        |
| 10              | Cu(acac) <sub>2</sub>       | -                               | MeCN       | 31                        |
| 11              | Cu(acac) <sub>2</sub>       | -                               | toluene    | trace                     |
| 12              | Cu(acac) <sub>2</sub>       | -                               | DMF        | trace                     |
| 13              | Cu(acac) <sub>2</sub>       | -                               | NMP        | trace                     |
| 14 <sup>d</sup> | Cu(acac) <sub>2</sub>       | -                               | DCE        | 48                        |
| 15 <sup>e</sup> | Cu(acac) <sub>2</sub>       | -                               | DCE        | 58                        |
| 16 <sup>f</sup> | Cu(acac) <sub>2</sub>       | -                               | DCE        | 82                        |

<sup>a</sup> Reaction conditions: **1a** (0.2 mmol), catalyst (10 mol%), DABCO·(SO<sub>2</sub>)<sub>2</sub> (1.2 eq.), **2a** (1.2 eq.), DCE (1.0 mL), stirred at 50 °C, under N<sub>2</sub>, 12 h. <sup>b</sup> Isolated yields. <sup>c</sup> DABCO·(SO<sub>2</sub>)<sub>2</sub> (0.6 eq.), <sup>d</sup> Under air. <sup>e</sup> Stirred at rt. <sup>f</sup> Stirred at 80 °C.

#### 4. Characterization of the products

##### *N*-(5-tosylquinolin-8-yl)benzamide (3a)

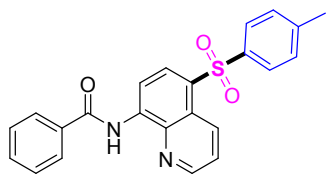

This compound is known;<sup>1</sup> white solid, 64 mg (80%); <sup>1</sup>H NMR (500 MHz, CDCl<sub>3</sub>) δ 10.97 (s, 1H), 9.10 (d, *J* = 8.7 Hz, 1H), 9.04 (d, *J* = 8.4 Hz, 1H), 8.88 (dd, *J* = 4.2, 1.5 Hz, 1H), 8.55 (d, *J* = 8.4 Hz, 1H), 8.07 (d, *J* = 7.1 Hz, 2H), 7.84 (d, *J* = 8.3 Hz, 2H), 7.60 (dd, *J* = 9.8, 5.7 Hz, 2H), 7.57 (t, *J* = 6.8 Hz, 2H), 7.28 (s, 2H), 2.37 (s, 3H). <sup>13</sup>C{<sup>1</sup>H} NMR (126 MHz, CDCl<sub>3</sub>) δ 165.69, 148.72, 144.15, 139.94, 139.11, 138.50, 134.41, 133.64, 132.44, 132.08, 129.91, 129.48, 128.97, 127.43, 127.32, 124.34, 123.31, 114.34, 21.52.

##### *N*-(5-(phenylsulfonyl)quinolin-8-yl)benzamide (3b)

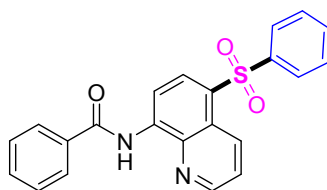

This compound is known;<sup>2</sup> white solid, 60 mg (77%); <sup>1</sup>H NMR (500 MHz, CDCl<sub>3</sub>) δ 10.97 (s, 1H), 9.07 (dd, *J* = 16.1, 8.5 Hz, 2H), 8.88 (s, 1H), 8.58 (d, *J* = 8.3 Hz, 1H), 8.07 (d, *J* = 7.3 Hz, 2H), 7.96 (d, *J* = 7.5 Hz, 2H), 7.64 – 7.52 (m, 5H), 7.50 – 7.46 (m, 2H). <sup>13</sup>C{<sup>1</sup>H} NMR (126 MHz, CDCl<sub>3</sub>) δ 165.68, 148.79, 142.07, 140.13, 138.50, 134.36, 133.50, 133.14, 132.45, 132.34, 129.28, 128.99, 128.97, 127.42, 127.21, 124.37, 123.39, 114.27.

##### *N*-[5-(4-Fluoro-benzenesulfonyl)-quinolin-8-yl]-benzamide (3c)

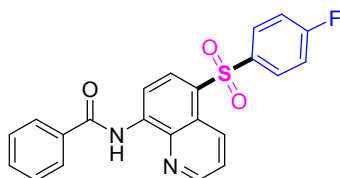

This compound is known;<sup>2</sup> white solid, 59 mg (73%); <sup>1</sup>H NMR (500 MHz, CDCl<sub>3</sub>) δ 10.98 (s, 1H), 9.05 (d, *J* = 8.5 Hz, 2H), 8.90 (dd, *J* = 4.2, 1.5 Hz, 1H), 8.56 (d, *J* = 8.4 Hz, 1H), 8.07 (d, *J* = 7.2 Hz, 2H), 7.98 (dd, *J* = 8.9, 5.0 Hz, 2H), 7.61 (dd, *J* = 8.0, 3.8 Hz, 2H), 7.57 (t, *J* = 7.4 Hz, 2H), 7.16 (t, *J* = 8.6 Hz, 2H). <sup>13</sup>C{<sup>1</sup>H} NMR (126 MHz, CDCl<sub>3</sub>) δ 166.33, 165.51 (d, *J* = 257.0 Hz), 148.87,

140.25, 138.49, 138.04 (d.  $J = 2.5$  Hz), 134.26, 133.29, 132.54, 132.38, 130.05 (d.  $J = 10.1$  Hz), 129.00, 128.70, 127.43, 124.23, 123.52, 116.64 (d.  $J = 22.7$  Hz), 114.26.

***N*-(5-((4-chlorophenyl)sulfonyl)quinolin-8-yl)benzamide (3d)**

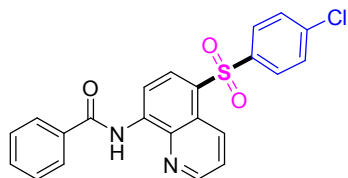

This compound is known;<sup>2</sup> white solid, 60 mg (71%); <sup>1</sup>H NMR (500 MHz, CDCl<sub>3</sub>)  $\delta$  10.98 (s, 1H), 9.05 (d,  $J = 8.4$  Hz, 1H), 9.03 (dd,  $J = 8.7$ , 1.4 Hz, 1H), 8.89 (dd,  $J = 4.1$ , 1.3 Hz, 1H), 8.57 (d,  $J = 8.4$  Hz, 1H), 8.07 (d,  $J = 7.2$  Hz, 2H), 7.89 (d,  $J = 8.7$  Hz, 2H), 7.63 – 7.58 (m, 2H), 7.56 (t,  $J = 7.4$  Hz, 2H), 7.44 (d,  $J = 8.7$  Hz, 2H). <sup>13</sup>C{<sup>1</sup>H} NMR (126 MHz, CDCl<sub>3</sub>)  $\delta$  165.79, 148.98, 146.63, 140.59, 140.44, 139.91, 138.54, 134.32, 133.33, 132.62, 129.71, 129.08, 128.76, 128.46, 127.51, 124.33, 123.65, 114.34.

***N*-[5-(4-Bromo-benzenesulfonyl)-quinolin-8-yl]-benzamide (3e)**

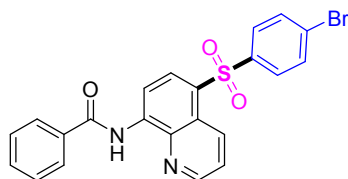

This compound is known;<sup>3</sup> white solid, 70 mg (75%); <sup>1</sup>H NMR (500 MHz, CDCl<sub>3</sub>)  $\delta$  10.97 (s, 1H), 9.04 (t,  $J = 9.4$  Hz, 2H), 8.89 (dd,  $J = 4.2$ , 1.4 Hz, 1H), 8.56 (d,  $J = 8.4$  Hz, 1H), 8.08 – 8.05 (m, 2H), 7.81 (d,  $J = 8.7$  Hz, 2H), 7.61 (dd,  $J = 8.7$ , 3.2 Hz, 4H), 7.56 (t,  $J = 7.3$  Hz, 2H). <sup>13</sup>C{<sup>1</sup>H} NMR (126 MHz, CDCl<sub>3</sub>)  $\delta$  165.68, 148.88, 141.14, 140.39, 138.49, 134.28, 133.26, 132.59, 132.56, 132.51, 128.98, 128.72, 128.37, 128.34, 127.42, 124.29, 123.53, 114.27.

***N*-(5-((4-methoxyphenyl)sulfonyl)quinolin-8-yl)benzamide (3f)**

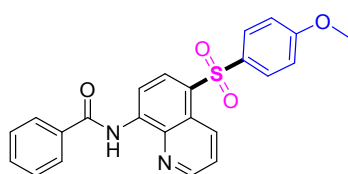

This compound is known;<sup>3</sup> white solid, 68 mg (81%); <sup>1</sup>H NMR (500 MHz, CDCl<sub>3</sub>)  $\delta$  10.96 (s, 1H), 9.09 (dd,  $J = 8.7$ , 1.6 Hz, 1H), 9.02 (d,  $J = 8.4$  Hz, 1H), 8.87 (dd,  $J = 4.2$ , 1.5 Hz, 1H), 8.52 (d,  $J = 8.4$  Hz, 1H), 8.08 – 8.05 (m, 2H), 7.90 – 7.88 (m, 2H), 7.62 – 7.55 (m, 4H), 6.95 – 6.92 (m, 2H), 3.81 (s, 3H).

$^{13}\text{C}\{^1\text{H}\}$  NMR (126 MHz,  $\text{CDCl}_3$ )  $\delta$  165.69, 163.31, 148.75, 139.79, 138.51, 134.36, 133.56, 133.42, 132.46, 131.75, 129.83, 129.53, 128.98, 127.42, 124.19, 123.34, 114.53, 114.26, 55.67.

***N*-(5-((4-(trifluoromethyl)phenyl)sulfonyl)quinolin-8-yl) benzamide (3g)**

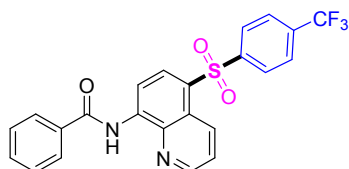

This compound is known;<sup>2</sup> white solid, 60 mg (65%);  $^1\text{H}$  NMR (500 MHz,  $\text{CDCl}_3$ )  $\delta$  11.00 (s, 1H), 9.08 (d,  $J$  = 8.4 Hz, 1H), 9.04 (d,  $J$  = 7.9 Hz, 1H), 8.90 (dd,  $J$  = 4.2, 1.4 Hz, 1H), 8.61 (d,  $J$  = 8.4 Hz, 1H), 8.08 (t,  $J$  = 8.6 Hz, 4H), 7.74 (d,  $J$  = 8.3 Hz, 2H), 7.62 (dt,  $J$  = 10.7, 4.6 Hz, 2H), 7.57 (t,  $J$  = 7.5 Hz, 2H).  $^{13}\text{C}\{^1\text{H}\}$  NMR (126 MHz,  $\text{CDCl}_3$ )  $\delta$  165.72, 148.99, 145.58, 140.68, 138.44, 134.78 (q,  $J$  = 33.0 Hz), 134.17, 133.11, 133.03, 132.59, 129.01, 127.72, 127.62, 127.43, 126.48 (q,  $J$  = 3.6 Hz), 124.34, 123.72, 123.03 (q,  $J$  = 271.4 Hz), 114.27.

***N*-(5-((4-nitrophenyl)sulfonyl)quinolin-8-yl)benzamide (3h)**

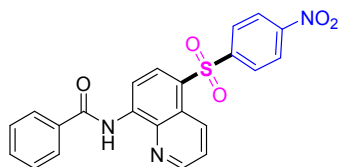

This compound is known;<sup>4</sup> yellow solid, 64 mg (62%);  $^1\text{H}$  NMR (500 MHz,  $\text{CDCl}_3$ )  $\delta$  11.00 (s, 1H), 9.10 (d,  $J$  = 8.5 Hz, 1H), 9.03 (dd,  $J$  = 8.7, 1.4 Hz, 1H), 8.92 (dd,  $J$  = 4.2, 1.4 Hz, 1H), 8.63 (d,  $J$  = 8.5 Hz, 1H), 8.31 (d,  $J$  = 8.9 Hz, 2H), 8.13 (d,  $J$  = 8.9 Hz, 2H), 8.07 (d,  $J$  = 7.2 Hz, 2H), 7.63 (t,  $J$  = 6.4 Hz, 2H), 7.58 (d,  $J$  = 7.7 Hz, 2H).  $^{13}\text{C}\{^1\text{H}\}$  NMR (126 MHz,  $\text{CDCl}_3$ )  $\delta$  165.73, 150.30, 149.07, 147.81, 141.05, 138.49, 134.17, 133.43, 132.97, 132.63, 129.04, 128.46, 127.45, 127.05, 124.53, 124.41, 123.81, 114.36.

***N*-(5-((3-nitrophenyl)sulfonyl)quinolin-8-yl)benzamide (3i)**

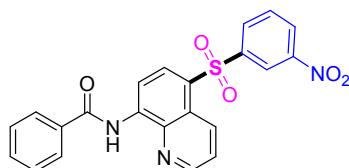

This compound is known;<sup>2</sup> yellow solid, 60 mg (69%);  $^1\text{H}$  NMR (500 MHz,  $\text{CDCl}_3$ )  $\delta$  10.99 (s, 1H), 9.09 (d,  $J$  = 8.5 Hz, 1H), 9.07 (dd,  $J$  = 8.8,



1.4 Hz, 1H), 8.92 (dd,  $J = 4.1, 1.3$  Hz, 1H), 8.80 (t,  $J = 1.8$  Hz, 1H), 8.63 (d,  $J = 8.5$  Hz, 1H), 8.37 (d,  $J = 8.2$  Hz, 1H), 8.25 (d,  $J = 7.9$  Hz, 1H), 8.06 (d,  $J = 7.3$  Hz, 2H), 7.70 (t,  $J = 8.0$  Hz, 1H), 7.64 (dd,  $J = 11.4, 6.9$  Hz, 2H), 7.57 (t,  $J = 7.4$  Hz, 2H).  $^{13}\text{C}\{^1\text{H}\}$  NMR (126 MHz,  $\text{CDCl}_3$ )  $\delta$  165.71, 149.08, 148.42, 144.44, 141.00, 138.48, 134.18, 133.38, 132.95, 132.64, 132.61, 130.76, 129.02, 127.61, 127.44, 127.18, 124.36, 123.88, 122.33, 114.36.

***N*-(5-(mesitylsulfonyl)quinolin-8-yl)benzamide (3j)**

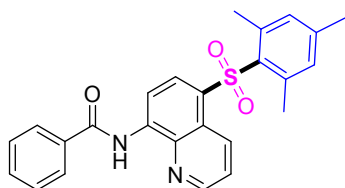

This compound is known;<sup>4</sup> white solid, 27 mg (31%);  $^1\text{H}$  NMR (500 MHz,  $\text{CDCl}_3$ )  $\delta$  10.95 (s, 1H), 8.94 (d,  $J = 8.4$  Hz, 1H), 8.88 (dd,  $J = 4.2, 1.5$  Hz, 1H), 8.84 (d,  $J = 8.7$  Hz, 1H), 8.07 (d,  $J = 8.0$  Hz, 3H), 7.63 – 7.59 (m, 1H), 7.56 (d,  $J = 7.8$  Hz, 2H), 7.55 – 7.53 (m, 1H), 6.97 (s, 2H), 2.57 (s, 6H), 2.31 (s, 3H).  $^{13}\text{C}\{^1\text{H}\}$  NMR (126 MHz,  $\text{CDCl}_3$ )  $\delta$  165.69, 148.80, 143.58, 140.02, 139.04, 138.44, 134.45, 134.30, 133.31, 132.45, 132.38, 132.08, 129.35, 128.94, 127.39, 124.04, 123.10, 113.78, 22.80, 21.04.

***N*-(5-(naphthalen-1-ylsulfonyl)quinolin-8-yl)benzamide (3k)**

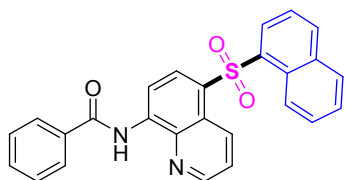

White solid, 55 mg (63%); m.p. 168-169 °C;  $^1\text{H}$  NMR (500 MHz,  $\text{CDCl}_3$ )  $\delta$  10.95 (s, 1H), 9.14 (dd,  $J = 8.7, 1.3$  Hz, 1H), 9.06 (d,  $J = 8.4$  Hz, 1H), 8.83 (dd,  $J = 4.2, 1.3$  Hz, 1H), 8.65 – 8.60 (m, 2H), 8.05 (d,  $J = 7.3$  Hz, 2H), 7.96 (d,  $J = 8.9$  Hz, 1H), 7.86 (d,  $J = 8.7$  Hz, 1H), 7.81 (d,  $J = 7.3$  Hz, 2H), 7.60 – 7.56 (m, 3H), 7.56 – 7.53 (m, 3H).  $^{13}\text{C}\{^1\text{H}\}$  NMR (126 MHz,  $\text{CDCl}_3$ )  $\delta$  165.65, 148.80, 140.15, 138.92, 138.47, 134.95, 134.32, 133.48, 132.46, 132.42, 132.14, 129.68, 129.37, 129.20, 128.97, 128.50, 127.94, 127.72, 127.65, 127.42, 124.37, 123.44, 122.32, 114.27.

#### 4-methyl-*N*-(5-tosylquinolin-8-yl)benzamide (3l)

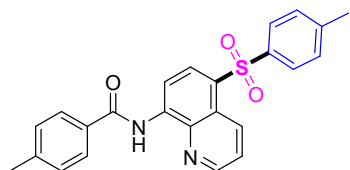

This compound is known;<sup>5</sup> white solid, 68 mg (81%); <sup>1</sup>H NMR (500 MHz, CDCl<sub>3</sub>) δ 10.93 (s, 1H), 9.08 (dd, *J* = 8.7, 1.3 Hz, 1H), 9.03 (d, *J* = 8.4 Hz, 1H), 8.87 (dd, *J* = 4.1, 1.3 Hz, 1H), 8.54 (d, *J* = 8.4 Hz, 1H), 7.96 (d, *J* = 8.1 Hz, 2H), 7.83 (d, *J* = 8.3 Hz, 2H), 7.57 (dd, *J* = 8.7, 4.2 Hz, 1H), 7.35 (d, *J* = 8.0 Hz, 2H), 7.27 (d, *J* = 5.7 Hz, 2H), 2.45 (s, 3H), 2.36 (s, 3H). <sup>13</sup>C{<sup>1</sup>H} NMR (126 MHz, CDCl<sub>3</sub>) δ 165.67, 148.69, 144.11, 143.12, 140.09, 139.16, 138.53, 133.57, 132.11, 131.61, 129.90, 129.63, 129.24, 127.46, 127.30, 124.33, 123.28, 114.20, 21.58, 21.52.

#### 4-methoxy-*N*-(5-tosylquinolin-8-yl)benzamide (3m)

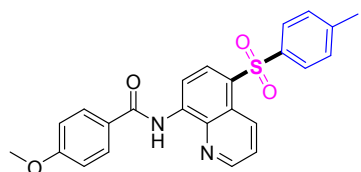

This compound is known;<sup>1</sup> white solid, 74 mg (85%); <sup>1</sup>H NMR (500 MHz, CDCl<sub>3</sub>) δ 10.88 (s, 1H), 9.07 (dd, *J* = 8.7, 1.4 Hz, 1H), 9.00 (d, *J* = 8.4 Hz, 1H), 8.85 (dd, *J* = 4.2, 1.4 Hz, 1H), 8.53 (d, *J* = 8.4 Hz, 1H), 8.02 (d, *J* = 8.8 Hz, 2H), 7.83 (d, *J* = 8.3 Hz, 2H), 7.56 (dd, *J* = 8.7, 4.2 Hz, 1H), 7.26 (d, *J* = 8.2 Hz, 2H), 7.02 (d, *J* = 8.8 Hz, 2H), 3.88 (s, 3H), 2.35 (s, 3H). <sup>13</sup>C{<sup>1</sup>H} NMR (126 MHz, CDCl<sub>3</sub>) δ 165.14, 163.03, 148.65, 144.09, 140.18, 139.17, 138.48, 133.51, 132.10, 129.88, 129.37, 129.02, 127.27, 126.60, 124.31, 123.27, 114.18, 114.02, 55.52, 21.50.

#### 4-nitro-*N*-(5-tosylquinolin-8-yl)benzamide(3n)

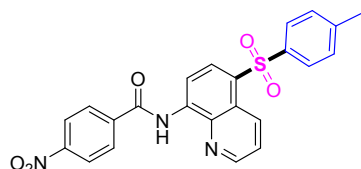

This compound is known;<sup>1</sup> yellow solid, 63 mg (70%); <sup>1</sup>H NMR (500 MHz, CDCl<sub>3</sub>) δ 11.03 (s, 1H), 9.12 (dd, *J* = 8.7, 1.4 Hz, 1H), 9.01 (d, *J* = 8.4 Hz, 1H), 8.89 (dd, *J* = 4.2, 1.4 Hz, 1H), 8.56 (d, *J* = 8.4 Hz, 1H), 8.42 (d, *J* = 8.8 Hz, 2H), 8.23 (d, *J* = 8.8 Hz, 2H), 7.84 (s, 2H), 7.62 (dd, *J* = 8.7, 4.2 Hz, 1H), 7.30 (s, 2H), 2.38 (s, 3H). <sup>13</sup>C{<sup>1</sup>H} NMR (126 MHz, CDCl<sub>3</sub>) δ 163.53, 150.17, 149.01,

144.36, 139.80, 139.13, 138.89, 138.45, 133.80, 131.82, 130.54, 129.98, 128.64, 127.39, 124.32, 124.21, 123.54, 114.70, 21.55.

**4-iodo-*N*-(5-tosylquinolin-8-yl)benzamide (3o)**

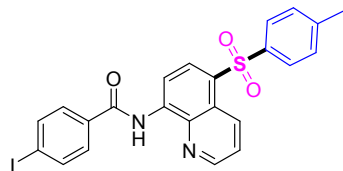

This compound is known;<sup>4</sup> white solid, 76 mg (72%); <sup>1</sup>H NMR (500 MHz, CDCl<sub>3</sub>) δ 10.93 (s, 1H), 9.09 (dd, *J* = 8.7, 1.5 Hz, 1H), 9.00 (d, *J* = 8.4 Hz, 1H), 8.87 (dd, *J* = 4.2, 1.5 Hz, 1H), 8.55 (d, *J* = 8.4 Hz, 1H), 7.92 (d, *J* = 8.5 Hz, 2H), 7.84 (d, *J* = 8.3 Hz, 2H), 7.78 (d, *J* = 8.5 Hz, 2H), 7.59 (dd, *J* = 8.7, 4.2 Hz, 1H), 7.28 (s, 2H), 2.37 (s, 3H). <sup>13</sup>C{<sup>1</sup>H} NMR (126 MHz, CDCl<sub>3</sub>) δ 164.95, 148.80, 144.23, 139.60, 138.93, 138.43, 138.25, 133.78, 133.67, 131.99, 129.94, 129.71, 128.92, 127.33, 124.29, 123.41, 114.41, 99.77, 21.56.

***N*-(5-tosylquinolin-8-yl)-[1,1'-biphenyl]-2-carboxamide (3p)**

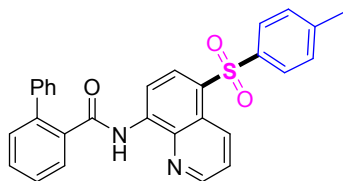

This compound is known;<sup>4</sup> white solid, 75 mg (79%); <sup>1</sup>H NMR (500 MHz, CDCl<sub>3</sub>) δ 9.94 (s, 1H), 8.93 (dd, *J* = 8.7, 1.5 Hz, 1H), 8.89 (d, *J* = 8.4 Hz, 1H), 8.47 (dd, *J* = 4.2, 1.5 Hz, 1H), 8.44 (d, *J* = 8.4 Hz, 1H), 7.91 (d, *J* = 7.6 Hz, 1H), 7.79 (d, *J* = 8.3 Hz, 2H), 7.56 (t, *J* = 6.8 Hz, 1H), 7.49 (d, *J* = 6.4 Hz, 1H), 7.46 (d, *J* = 7.5 Hz, 3H), 7.41 (dd, *J* = 8.7, 4.2 Hz, 1H), 7.24 (t, *J* = 6.1 Hz, 4H), 7.13 (t, *J* = 7.5 Hz, 1H), 2.33 (s, 3H). <sup>13</sup>C{<sup>1</sup>H} NMR (126 MHz, CDCl<sub>3</sub>) δ 168.12, 148.10, 144.13, 140.43, 139.78, 139.74, 139.04, 138.07, 135.23, 133.09, 131.87, 131.09, 130.87, 129.88, 129.56, 129.17, 129.04, 128.49, 127.85, 127.79, 127.31, 123.98, 123.01, 113.91, 21.52.

### 3-methyl-*N*-(5-tosylquinolin-8-yl)benzamide (3q)

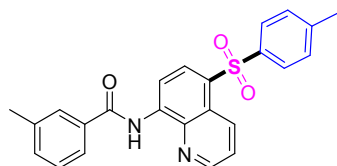

This compound is known;<sup>2</sup> white solid, 67 mg (80%); <sup>1</sup>H NMR (500 MHz, CDCl<sub>3</sub>) δ 10.91 (s, 1H), 9.07 (dd, *J* = 8.7, 1.3 Hz, 1H), 9.02 (d, *J* = 8.4 Hz, 1H), 8.86 (dd, *J* = 4.1, 1.3 Hz, 1H), 8.53 (d, *J* = 8.4 Hz, 1H), 7.87 – 7.81 (m, 4H), 7.56 (dd, *J* = 8.7, 4.2 Hz, 1H), 7.42 (d, *J* = 7.5 Hz, 2H), 7.26 (d, *J* = 8.2 Hz, 2H), 2.47 (s, 3H), 2.35 (s, 3H). <sup>13</sup>C{<sup>1</sup>H} NMR (126 MHz, CDCl<sub>3</sub>) δ 165.89, 148.74, 144.13, 140.02, 139.13, 138.91, 138.52, 134.38, 133.54, 133.20, 132.05, 129.90, 129.80, 129.36, 128.80, 128.18, 127.30, 124.32, 123.30, 114.25, 21.51, 21.46.

### *N*-(5-tosylquinolin-8-yl)furan-2-carboxamide (3r)

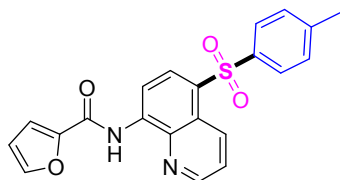

This compound is known;<sup>5</sup> white solid, 53 mg (68%); <sup>1</sup>H NMR (500 MHz, CDCl<sub>3</sub>) δ 10.96 (s, 1H), 9.05 (d, *J* = 8.7 Hz, 1H), 8.95 (d, *J* = 8.4 Hz, 1H), 8.87 (dd, *J* = 4.1, 1.4 Hz, 1H), 8.50 (d, *J* = 8.4 Hz, 1H), 7.82 (d, *J* = 8.3 Hz, 2H), 7.62 (s, 1H), 7.56 (dd, *J* = 8.7, 4.1 Hz, 1H), 7.33 – 7.31 (m, 1H), 7.26 (d, *J* = 8.1 Hz, 2H), 6.59 (dd, *J* = 3.4, 1.7 Hz, 1H), 2.34 (s, 3H). <sup>13</sup>C{<sup>1</sup>H} NMR (126 MHz, CDCl<sub>3</sub>) δ 156.46, 148.84, 147.76, 145.05, 144.17, 139.60, 139.04, 138.36, 133.43, 131.89, 129.91, 129.53, 127.31, 124.29, 123.33, 116.17, 114.28, 112.73, 21.51.

### *N*-(5-tosylquinolin-8-yl)cyclohexanecarboxamide (3s)

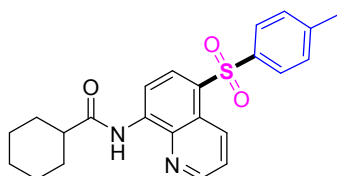

This compound is known;<sup>3</sup> white solid, 65 mg (79%); <sup>1</sup>H NMR (500 MHz, CDCl<sub>3</sub>) δ 10.11 (s, 1H), 9.03 (dd, *J* = 8.7, 1.3 Hz, 1H), 8.88 (d, *J* = 8.4 Hz, 1H), 8.81 (dd, *J* = 4.1, 1.3 Hz, 1H), 8.47 (d, *J* = 8.4 Hz, 1H), 7.79 (d, *J* = 8.3 Hz, 2H), 7.53 (dd, *J* = 8.7, 4.2 Hz, 1H), 7.23 (d, *J* = 8.2 Hz, 2H), 2.48 (t, *J* = 11.6 Hz, 1H), 2.33 (s, 3H), 2.05 (d, *J* = 13.3 Hz, 2H), 1.86 (d, *J* = 13.2 Hz, 2H), 1.65 – 1.57 (m,

2H), 1.43 – 1.34 (m, 2H), 1.34 – 1.22 (m, 2H).  $^{13}\text{C}\{^1\text{H}\}$  NMR (126 MHz,  $\text{CDCl}_3$ )  $\delta$  175.26, 148.56, 144.07, 140.03, 139.13, 138.18, 133.44, 132.05, 129.86, 128.91, 127.22, 124.23, 123.20, 114.09, 46.84, 29.61, 25.70, 25.63, 21.49.

***N*-(5-tosylquinolin-8-yl)cyclopropanecarboxamide (3t)**

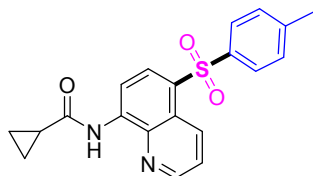

This compound is known;<sup>6</sup> white solid, 54 mg (74%);  $^1\text{H}$  NMR (500 MHz,  $\text{CDCl}_3$ )  $\delta$  10.24 (s, 1H), 9.01 (dd,  $J$  = 8.7, 1.6 Hz, 1H), 8.83 – 8.81 (m, 2H), 8.46 (d,  $J$  = 8.4 Hz, 1H), 7.79 (d,  $J$  = 8.1 Hz, 2H), 7.53 (dd,  $J$  = 8.7, 4.2 Hz, 1H), 7.23 (d,  $J$  = 6.4 Hz, 2H), 2.34 (s, 3H), 1.82 – 1.80 (m, 1H), 1.17 – 1.15 (m, 2H), 0.96 – 0.94 (m, 2H).  $^{13}\text{C}\{^1\text{H}\}$  NMR (126 MHz,  $\text{CDCl}_3$ )  $\delta$  172.85, 148.54, 144.10, 139.94, 139.02, 137.89, 133.37, 132.05, 129.87, 128.22, 127.22, 124.21, 123.24, 113.99, 21.53, 16.45, 8.84.

***N*-(6-methoxy-5-tosylquinolin-8-yl)benzamide (3u)**

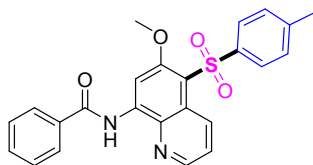

This compound is known;<sup>2</sup> white solid, 75 mg (87%);  $^1\text{H}$  NMR (500 MHz,  $\text{CDCl}_3$ )  $\delta$  11.10 (s, 1H), 9.94 (dd,  $J$  = 9.0, 1.4 Hz, 1H), 8.79 (s, 1H), 8.75 (dd,  $J$  = 4.1, 1.4 Hz, 1H), 8.04 (d,  $J$  = 7.0 Hz, 2H), 7.84 (d,  $J$  = 8.3 Hz, 2H), 7.63 – 7.58 (m, 2H), 7.55 (t,  $J$  = 7.3 Hz, 2H), 7.28 – 7.24 (m, 2H), 3.87 (s, 3H), 2.39 (s, 3H).  $^{13}\text{C}\{^1\text{H}\}$  NMR (126 MHz,  $\text{CDCl}_3$ )  $\delta$  164.44, 159.10, 148.73, 144.16, 139.95, 138.51, 133.65, 132.45, 132.09, 129.92, 129.49, 128.98, 127.44, 127.33, 124.35, 123.32, 114.35, 102.71, 54.98, 21.53.

***N*-(2-methyl-5-tosylquinolin-8-yl)benzamide (3v)**

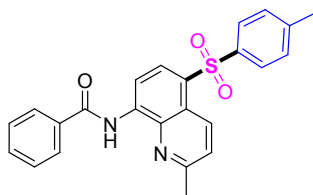

This compound is known;<sup>2</sup> white solid, 59 mg (71%);  $^1\text{H}$  NMR (500 MHz,  $\text{CDCl}_3$ )  $\delta$  11.03 (s, 1H), 9.00 (d,  $J$  = 8.4 Hz, 1H), 8.94 (d,  $J$  = 8.8 Hz,

1H), 8.48 (d,  $J = 8.4$  Hz, 1H), 8.06 (d,  $J = 6.9$  Hz, 2H), 7.83 (d,  $J = 8.3$  Hz, 2H), 7.58 (dd,  $J = 13.9, 6.4$  Hz, 3H), 7.46 – 7.43 (m, 1H), 7.25 (s, 2H), 2.76 (s, 3H), 2.36 (s, 3H).  $^{13}\text{C}\{^1\text{H}\}$  NMR (126 MHz,  $\text{CDCl}_3$ )  $\delta$  165.65, 158.05, 144.08, 139.31, 139.11, 137.98, 134.49, 133.48, 132.37, 130.92, 129.86, 129.26, 128.99, 127.36, 127.27, 124.21, 122.44, 114.26, 25.25, 21.54.

**2-chloro-*N*-(5-tosylquinolin-8-yl)benzamide (3w)**

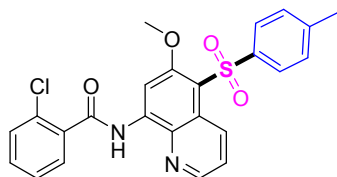

White solid, 73 mg (79%); m.p. 192-193 °C;  $^1\text{H}$  NMR (500 MHz,  $\text{CDCl}_3$ )  $\delta$  10.89 (s, 1H), 9.94 (dd,  $J = 9.0, 1.4$  Hz, 1H), 8.80 (s, 1H), 8.70 (dd,  $J = 4.1, 1.4$  Hz, 1H), 7.85 (d,  $J = 8.3$  Hz, 2H), 7.78 (dd,  $J = 7.5, 1.7$  Hz, 1H), 7.60 (dd,  $J = 9.0, 4.1$  Hz, 1H), 7.50 (d,  $J = 7.9$  Hz, 1H), 7.46 (t,  $J = 7.6$  Hz, 1H), 7.41 (t,  $J = 7.4$  Hz, 1H), 7.26 (d,  $J = 8.2$  Hz, 2H), 3.89 (s, 3H), 2.40 (s, 3H).  $^{13}\text{C}\{^1\text{H}\}$  NMR (126 MHz,  $\text{CDCl}_3$ )  $\delta$  164.38, 158.15, 145.27, 142.43, 139.99, 139.96, 133.75, 132.57, 132.03, 131.13, 130.17, 129.70, 129.11, 127.99, 126.29, 126.27, 126.12, 122.85, 114.00, 102.71, 55.81, 20.53. HRMS (ESI<sup>+</sup>): Calculated for  $\text{C}_{24}\text{H}_{19}\text{ClN}_2\text{O}_4\text{S}$ ,  $[\text{M}+\text{H}]^+$  467.0827, Found 467.0825.

***N*-(2-methyl-5-tosylquinolin-8-yl)thiophene-2-carboxamide (3x)**

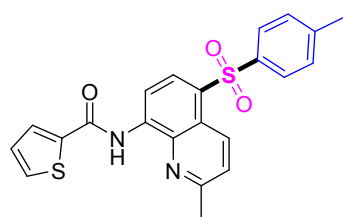

White solid, 63 mg (75%); m.p. 205-206 °C;  $^1\text{H}$  NMR (500 MHz,  $\text{CDCl}_3$ )  $\delta$  10.87 (s, 1H), 8.93 (d,  $J = 8.8$  Hz, 1H), 8.88 (d,  $J = 8.4$  Hz, 1H), 8.44 (d,  $J = 8.4$  Hz, 1H), 7.82 (d,  $J = 8.2$  Hz, 3H), 7.62 (dd,  $J = 4.9, 1.1$  Hz, 1H), 7.44 (d,  $J = 8.8$  Hz, 1H), 7.27 – 7.25 (m, 2H), 7.20 (dd,  $J = 4.9, 3.8$  Hz, 1H), 2.76 (s, 3H), 2.36 (s, 3H).  $^{13}\text{C}\{^1\text{H}\}$  NMR (126 MHz,  $\text{CDCl}_3$ )  $\delta$  159.05, 157.02, 143.02, 138.30, 138.07, 137.94, 136.65, 132.43, 130.69, 129.82, 128.83, 128.17, 128.04, 127.06, 126.23, 123.21, 121.34, 113.09, 24.18, 20.50. HRMS (ESI<sup>+</sup>): Calculated for  $\text{C}_{22}\text{H}_{18}\text{N}_2\text{O}_3\text{S}_2$ ,  $[\text{M}+\text{H}]^+$  423.0832, Found 423.0839.

### 5-tosylquinolin-8-amine (4a)

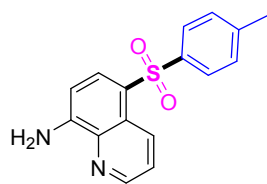

This compound is known;<sup>7</sup> yellow solid, 265 mg (89%); <sup>1</sup>H NMR (500 MHz, CDCl<sub>3</sub>) δ 8.91 (dd, *J* = 8.7, 1.3 Hz, 1H), 8.69 (dd, *J* = 4.1, 1.3 Hz, 1H), 8.30 (d, *J* = 8.3 Hz, 1H), 7.78 (d, *J* = 8.3 Hz, 2H), 7.43 (dd, *J* = 8.7, 4.2 Hz, 1H), 7.21 (d, *J* = 8.2 Hz, 2H), 6.87 (d, *J* = 8.3 Hz, 1H), 5.76 (s, 2H), 2.32 (s, 3H). <sup>13</sup>C{<sup>1</sup>H} NMR (126 MHz, CDCl<sub>3</sub>) δ 149.81, 147.35, 143.42, 140.18, 137.05, 133.08, 132.91, 129.69, 126.86, 125.48, 123.15, 121.47, 106.74, 21.44.

### (2-tosylethene-1,1-diyl)dibenzene (7)

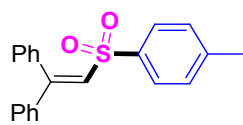

This compound is known.<sup>1</sup> white solid, 18 mg (32%); <sup>1</sup>H NMR (500 MHz, CDCl<sub>3</sub>) δ 7.49 (d, *J* = 8.3 Hz, 2H), 7.40 – 7.35 (m, 2H), 7.33 – 7.28 (m, 4H), 7.23 – 7.20 (m, 2H), 7.16 (d, *J* = 8.0 Hz, 2H), 7.13 – 7.08 (m, 2H), 7.01 (s, 1H), 2.38 (s, 3H).

### References:

- (1) J. Wei, J. Jiang, X. Xiao, D. Lin, Y. Deng, Z. Ke, H. Jiang, W. Zeng, *J. Org. Chem.*, 2016, **81**, 946.
- (2) H. Qiao, S. Sun, F. Yang, Y. Zhu, W. Zhu, Y. Dong, Y. Wu, X. Kong, L. Jiang, Y. Wu, *Org. Lett.*, 2015, **17**, 6086.
- (3) H.-W. Liang, K. Jiang, W. Ding, Y. Yuan, L. Shuai, Y.-C. Chen, Y. Wei, *Chem. Commun.*, 2015, **51**, 16928.
- (4) J. Xu, C. Shen, X. Zhu, P. Zhang, M. J. Ajitha, K.-W. Huang, Z. An, X. Liu, *Chem. Asian J.*, 2016, **11**, 882.
- (5) S. Liang, G. Manolikakes, *Adv. Synth. Catal.*, 2016, **358**, 2371.
- (6) Y. Wang, Y. Wang, Q. Zhang, D. Li, *Org. Chem. Front.*, 2017, **4**, 514.
- (7) J.-M. Li, J. Weng, Gui Lu, A. S. C. Chan, *Tetrahedron Lett.*, 2016, **57**, 2121.

## 5. Investigation into the mechanism of reaction

### The exploration of the analogous substrates

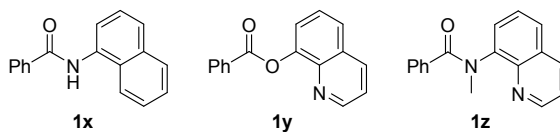

### KIE experiment

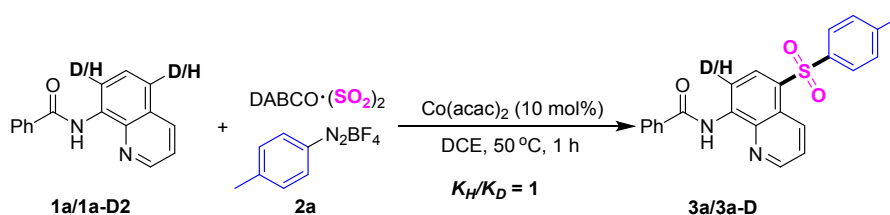

A mixture of **1a** (24.8 mg, 0.1 mmol), **1a-D2** (25.0 mg, 0.1 mmol),  $\text{DABCO} \cdot (\text{SO}_2)_2$  (57.6 mg, 1.2 eq.), **2a** (49.0 mg, 1.2 eq.),  $\text{Co}(\text{acac})_2$  (5.0 mg, 10 mol%) in 1,2-dichloroethane (1.0 mL) was stirred at 50 °C under  $\text{N}_2$  atmosphere for 1 h. Then the mixture was cooled to room temperature and poured into water (5.0 mL). The mixture was extracted with EtOAc (5.0 mL x 3) and the combined organic layer was washed with brine (10.0 mL), dried with  $\text{Na}_2\text{SO}_4$ , and the solvent was removed under reduced pressure. The products **3a/3a-D** was obtained in 22% yield by flash column chromatography using PE/AcOEt as an eluent. This result indicated that the turnover-limiting step does not involve C-H activation.



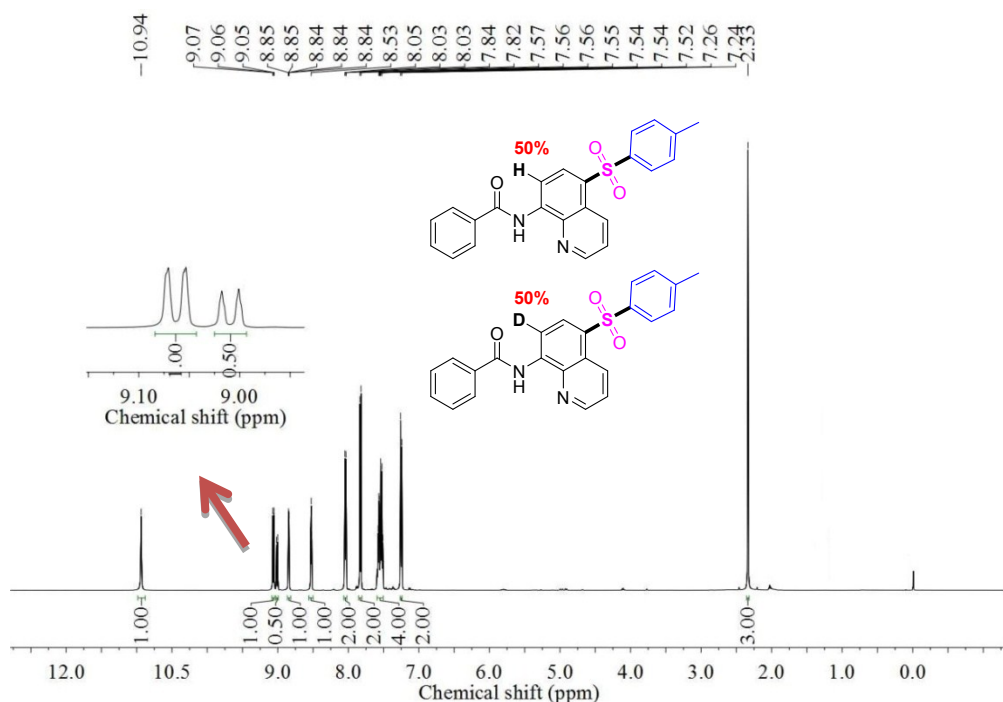

### Radical inhibition experiment

The reaction was inhibited in the presence of the radical inhibitor TEMPO or HQ, which showed that a radical pathway should be involved.

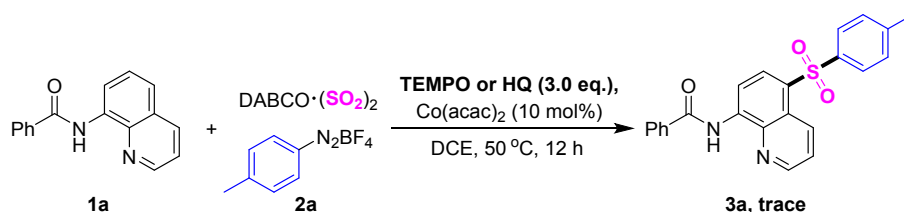

### Radical capture experiment

A mixture of **6** (36.0 mg, 0.2 mmol), DABCO•(SO<sub>2</sub>)<sub>2</sub> (57.6 mg, 1.2 eq.), **2a** (1.2 eq.), Co(acac)<sub>2</sub> (5.0 mg, 10 mol%) in 1,2-dichloroethane (1.0 mL) was stirred at 50 °C under N<sub>2</sub> atmosphere for 12 h. Then the mixture was cooled to room temperature and poured into water (5.0 mL). The mixture was extracted with EtOAc (5.0 mL x 3) and the combined organic layer was washed with brine (10.0 mL), dried with Na<sub>2</sub>SO<sub>4</sub>, and the solvent was removed under reduced pressure. The products **7** were purified by flash column chromatography using PE/AcOEt as an eluent.

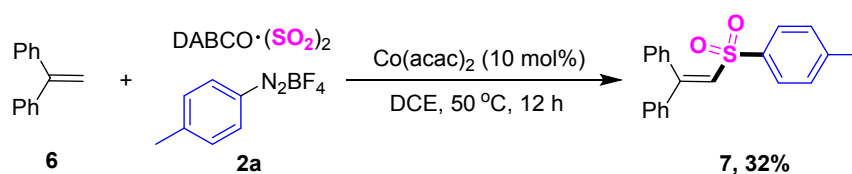

## 6. X-ray Crystal Data for 3f

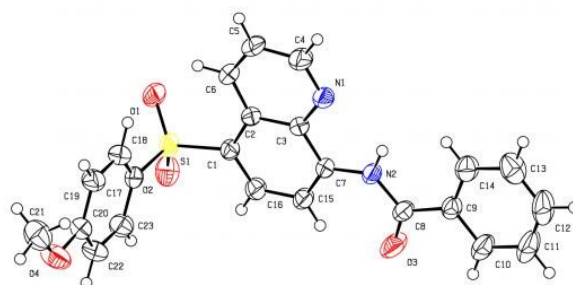

**Figure 1** Single-crystal X-ray structure of **3f**. Ellipsoids are represented at 30% probability.

**Table S1.** Crystallographic data and structure refinement for **3f**

|                                          |                                                                 |
|------------------------------------------|-----------------------------------------------------------------|
| CCDC                                     | 1565132                                                         |
| Empirical formula                        | C <sub>23</sub> H <sub>18</sub> N <sub>2</sub> O <sub>4</sub> S |
| Formula weight                           | 418.45                                                          |
| Temperature, K                           | 296.15                                                          |
| Wavelength, Å                            | 0.71073                                                         |
| Crystal system                           | Triclinic                                                       |
| Space group                              | P-1                                                             |
| <i>a</i> , <i>b</i> , <i>c</i> , Å       | 10.136 (3), 10.173 (3), 11.012 (3)                              |
| $\alpha$ , $\beta$ , $\gamma$ , °        | 104.003 (3), 97.178 (3), 111.781 (3)                            |
| Volume, Å <sup>3</sup>                   | 993.6 (5)                                                       |
| <i>Z</i>                                 | 2                                                               |
| Calculated density, Mg/m <sup>3</sup>    | 1.399                                                           |
| Absorption coefficient, mm <sup>-1</sup> | 0.197                                                           |
| <i>F</i> (000)                           | 365                                                             |
| Crystal size, mm                         | 0.20 x 0.20 x 0.20                                              |
| Theta range for data collection, °       | 2.228 to 27.801                                                 |
| Limiting indices                         | -13 ≤ <i>h</i> ≤ 13, -12 ≤ <i>k</i> ≤ 12, -14 ≤ <i>l</i> ≤ 13   |
| Reflections collected / unique           | 7906 / 4238 [R(int) = 0.0478]                                   |
| Absorption correction                    | Semi-empirical from equivalents                                 |
| Refinement method                        | Full-matrix least-squares on <i>F</i> <sup>2</sup>              |
| Data / restraints / parameters           | 4238 / 0 / 272                                                  |
| Goodness of fit on <i>F</i> <sup>2</sup> | 1.040                                                           |
| Final R indices [I > 2σ(I)]              | R1 = 0.0520, wR2 = 0.1388                                       |
| R indices (all data)                     | R1 = 0.0607, wR2 = 0.1499                                       |

## 7. Copies of $^1\text{H}$ and $^{13}\text{C}\{^1\text{H}\}$ NMR Spectra

### 3a $^1\text{H}$ NMR

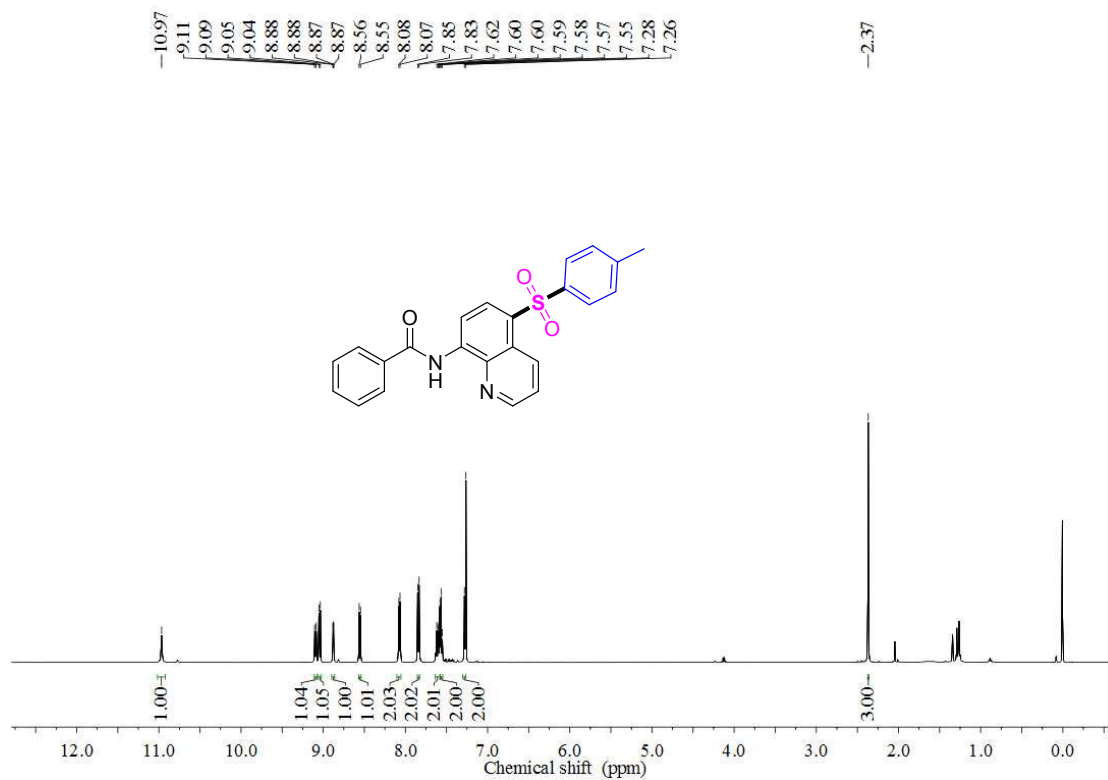

### 3a $^{13}\text{C}\{^1\text{H}\}$ NMR

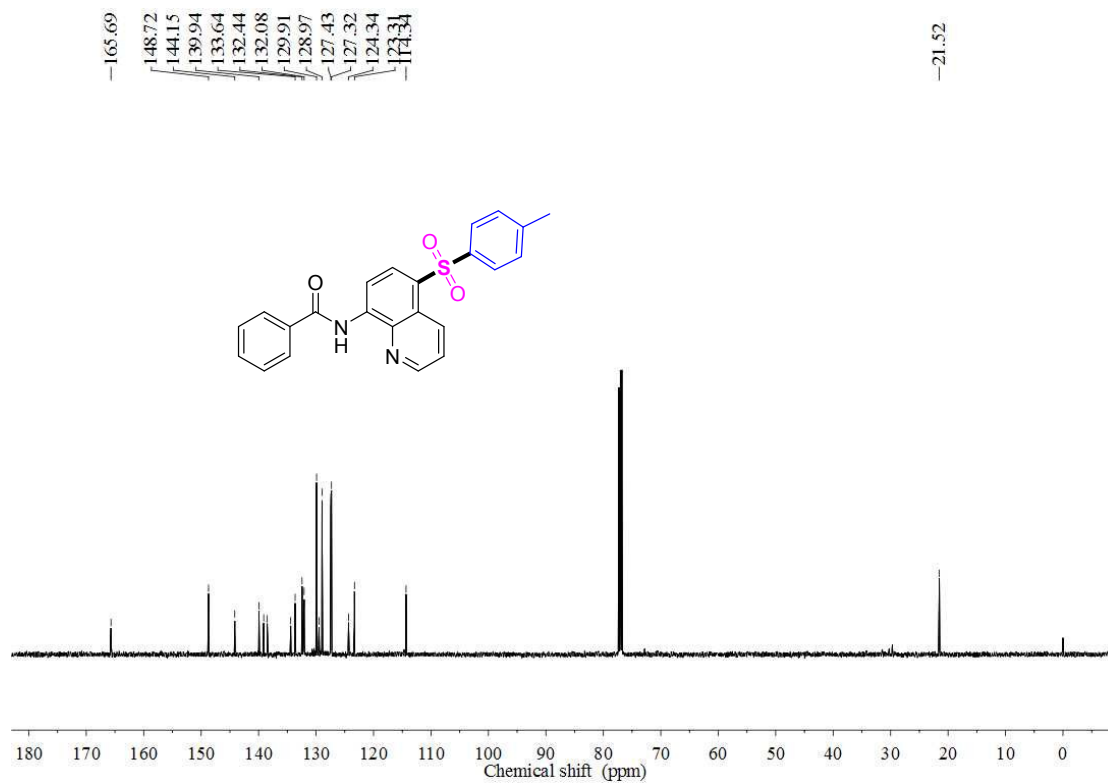

### 3b $^1\text{H}$ NMR

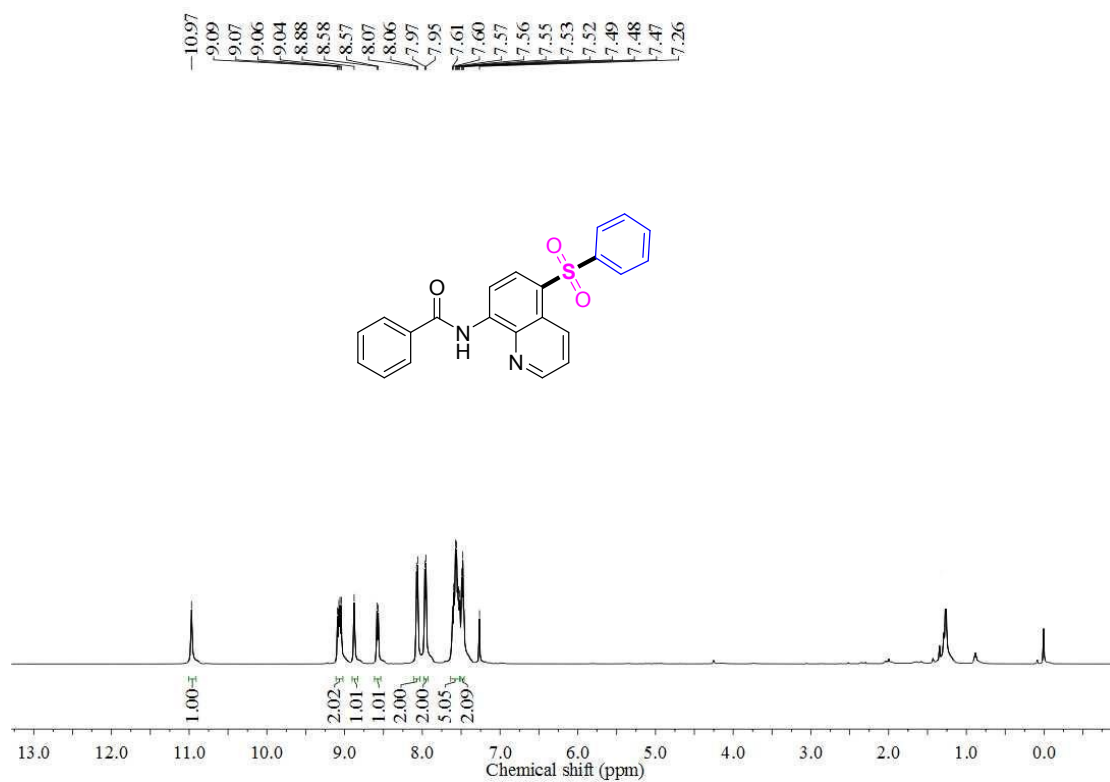

### 3b $^{13}\text{C}\{^1\text{H}\}$ NMR

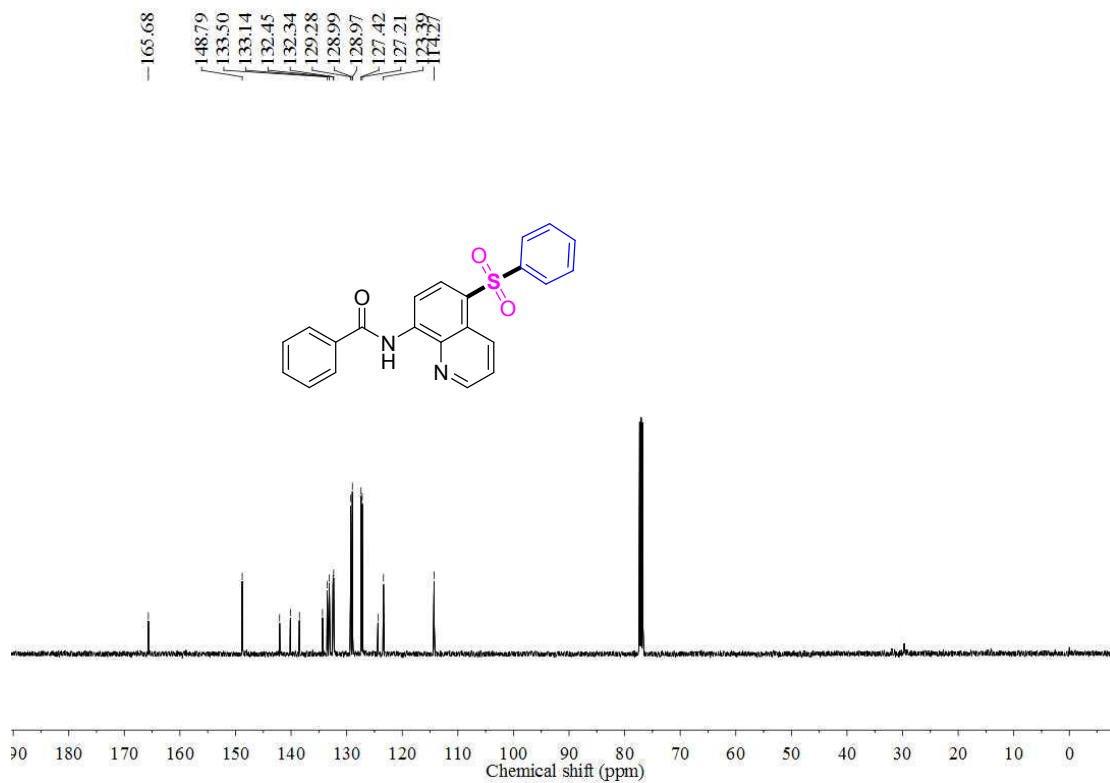

### 3c $^1\text{H}$ NMR

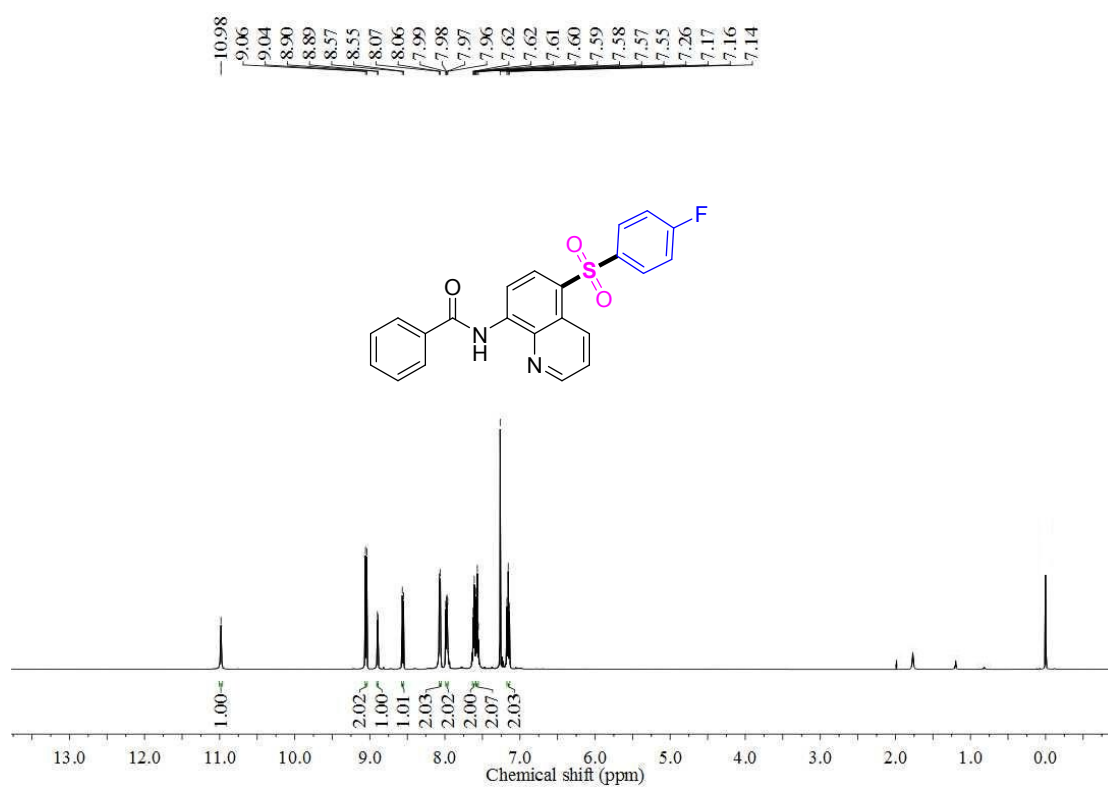

### 3c $^{13}\text{C}\{^1\text{H}\}$ NMR

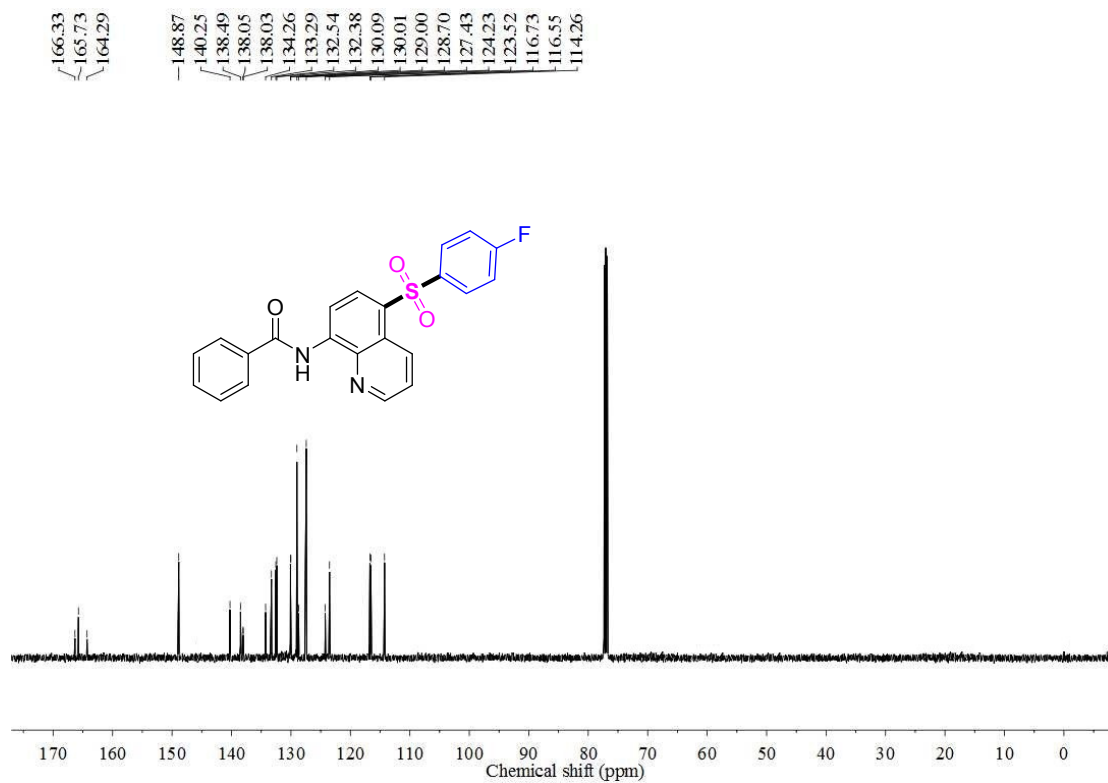

### 3d $^1\text{H}$ NMR

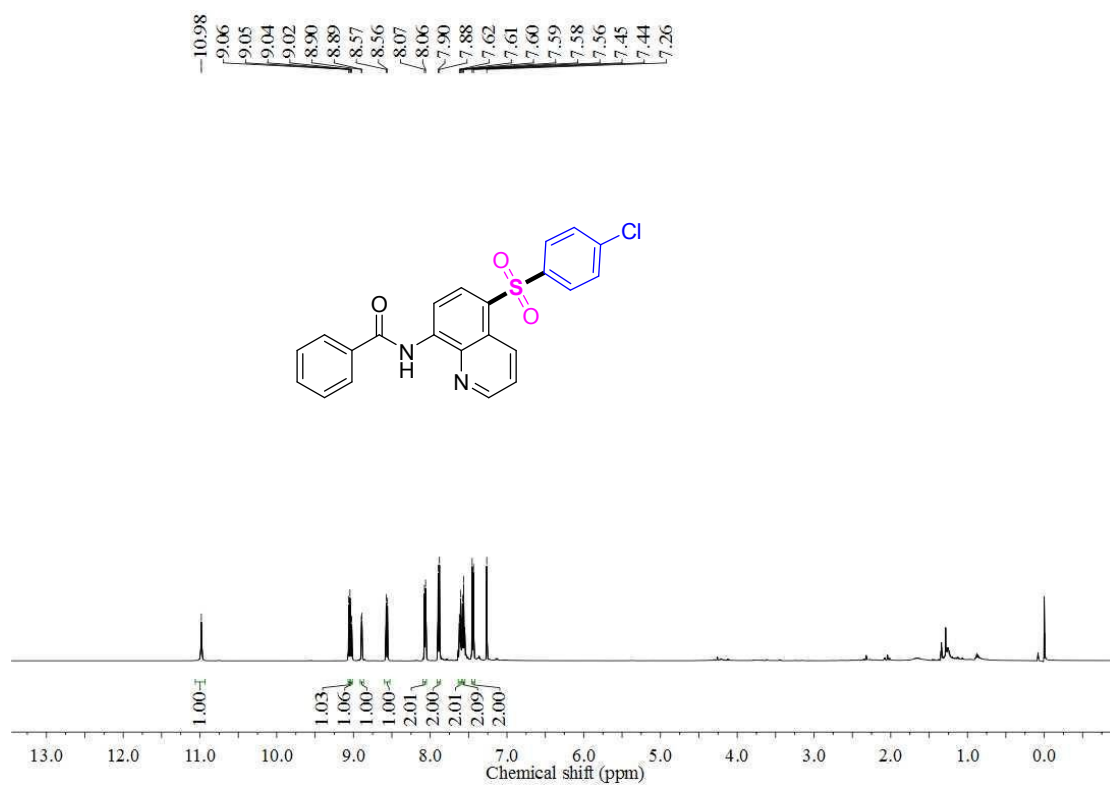

### 3d $^{13}\text{C}\{^1\text{H}\}$ NMR

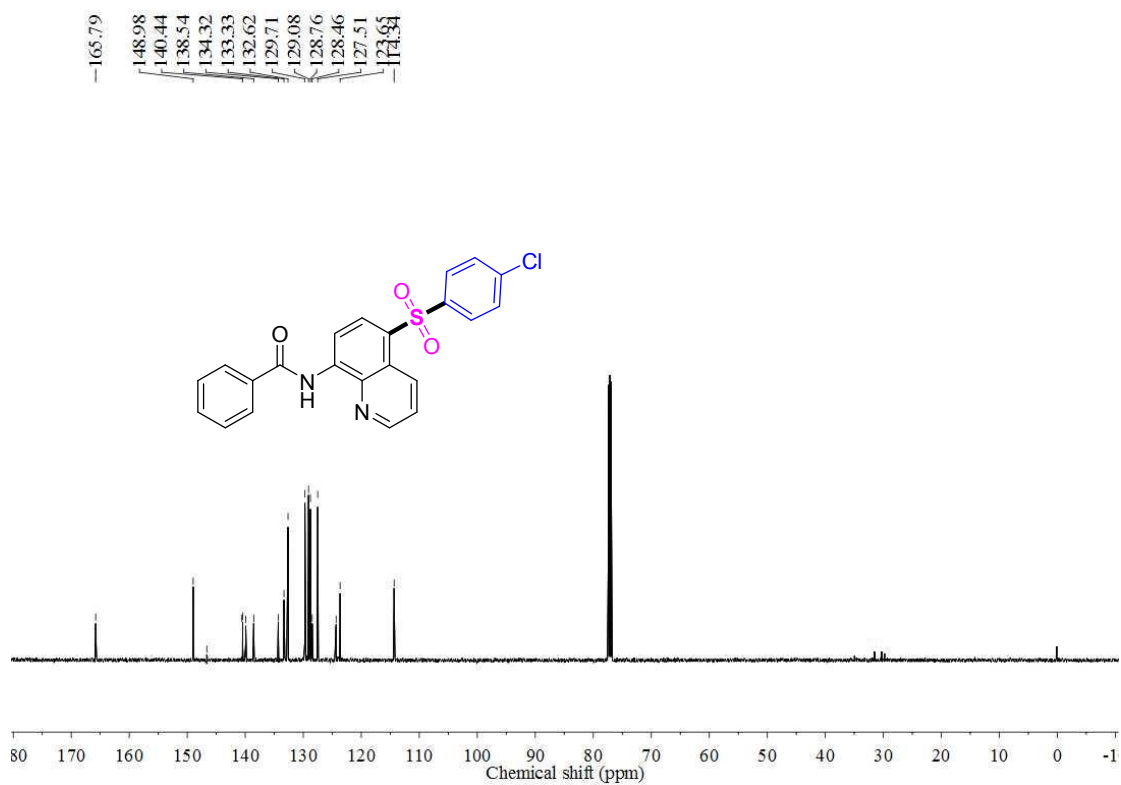

### 3e $^1\text{H}$ NMR

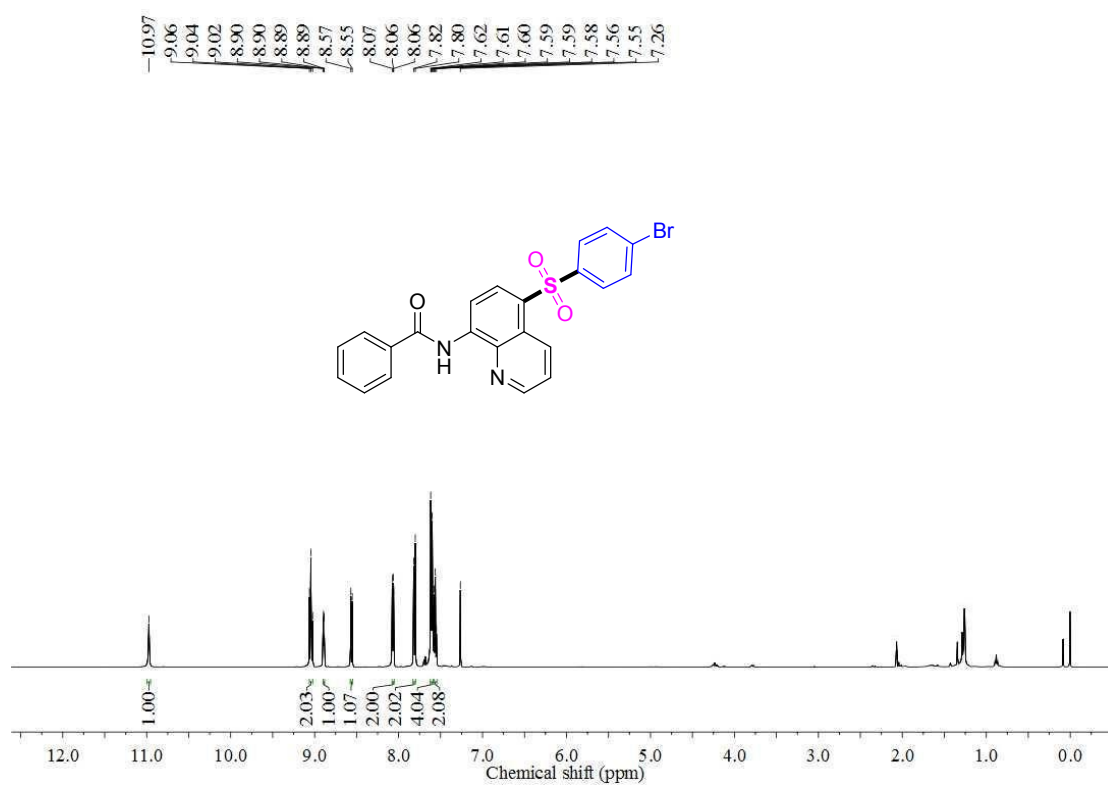

### 3e $^{13}\text{C}\{^1\text{H}\}$ NMR

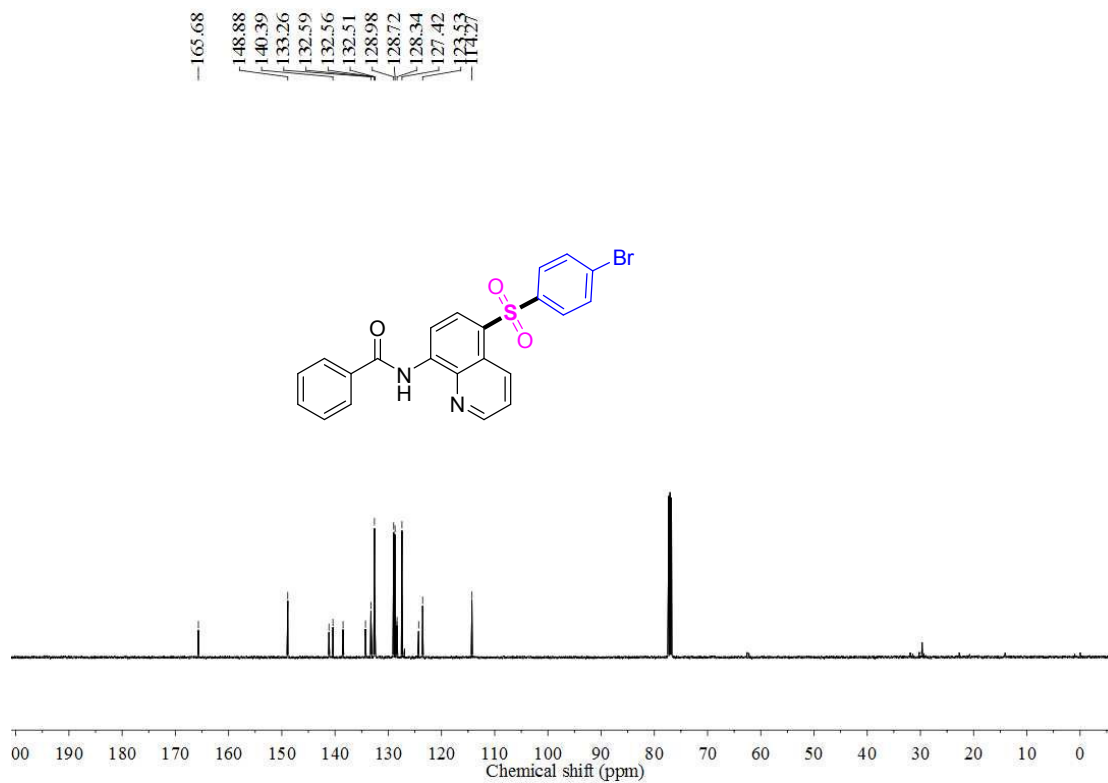

### 3f $^1\text{H}$ NMR

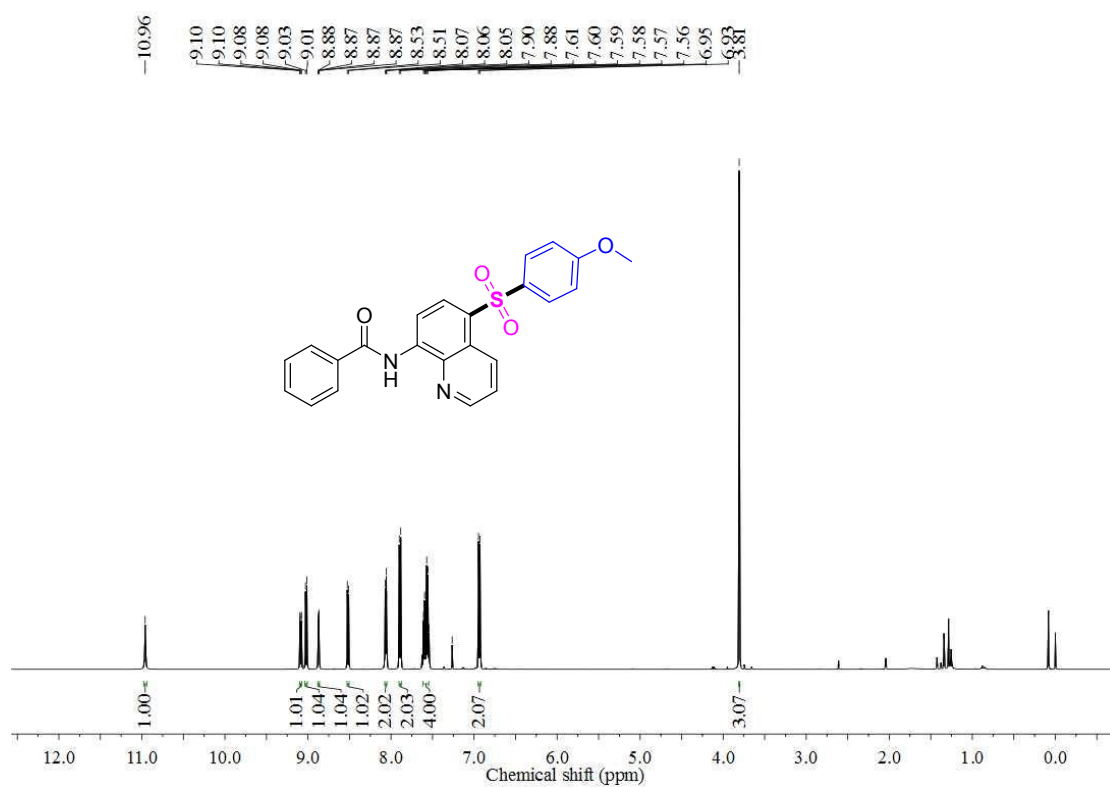

### 3f $^{13}\text{C}\{^1\text{H}\}$ NMR

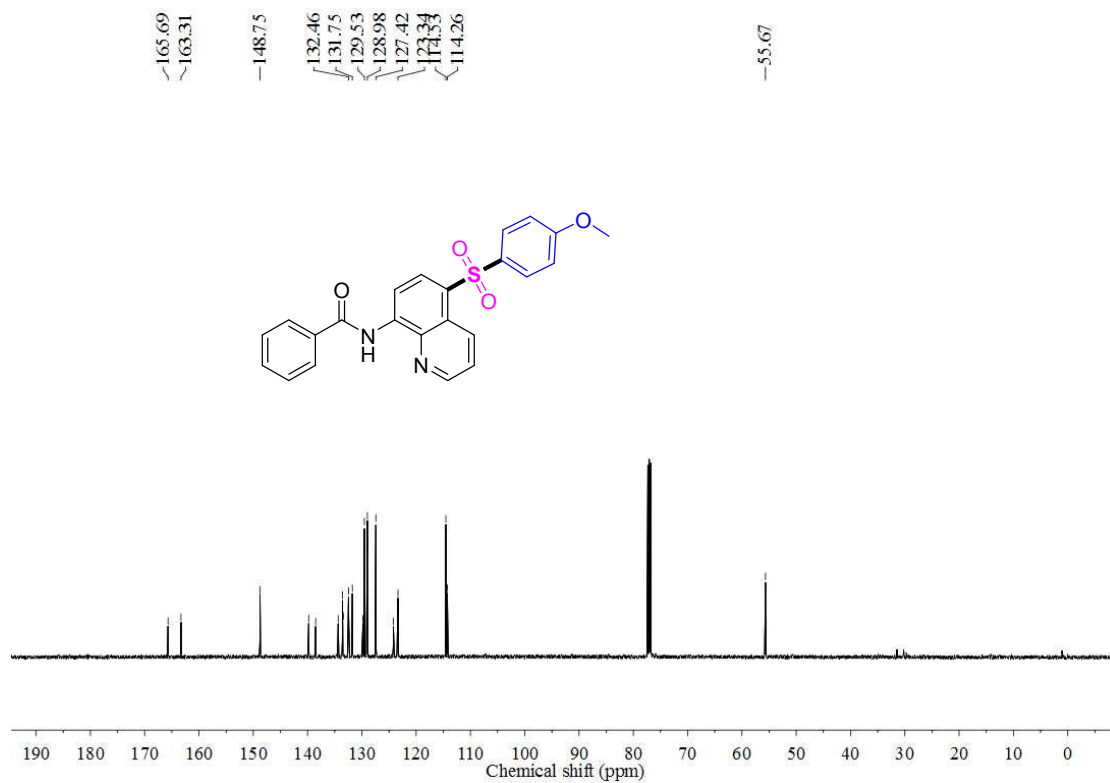



### 3g $^1\text{H}$ NMR

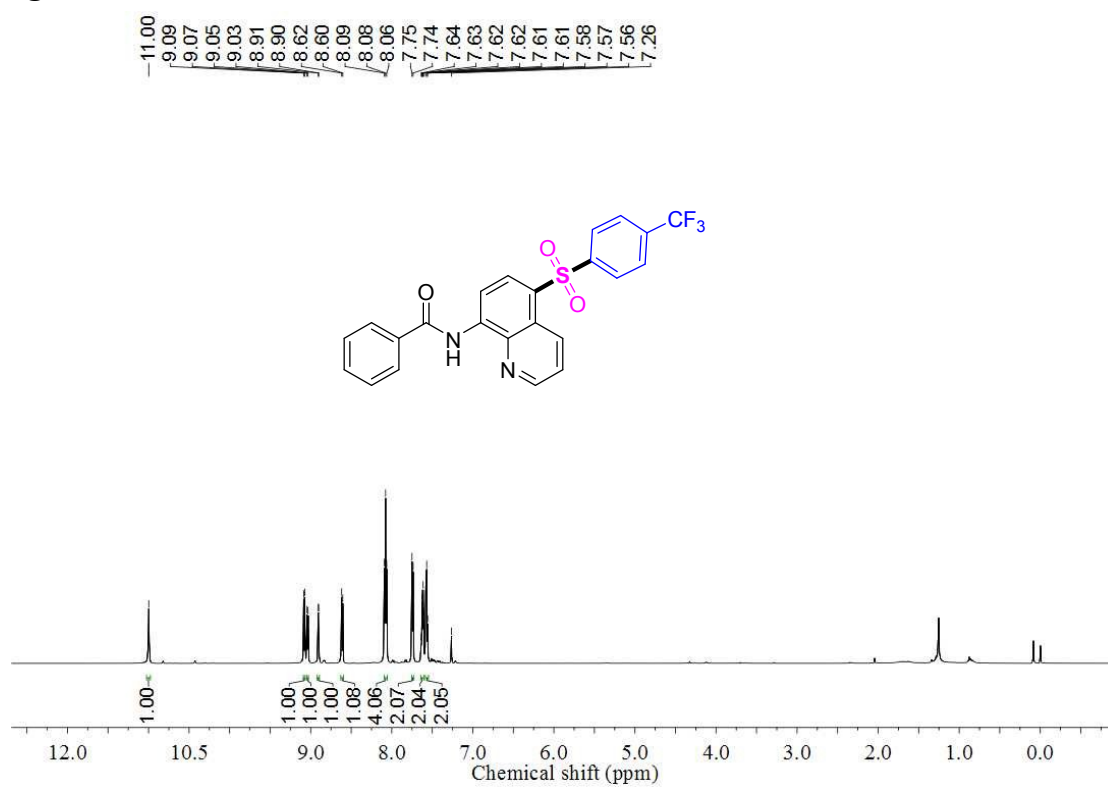

### 3g $^{13}\text{C}\{^1\text{H}\}$ NMR

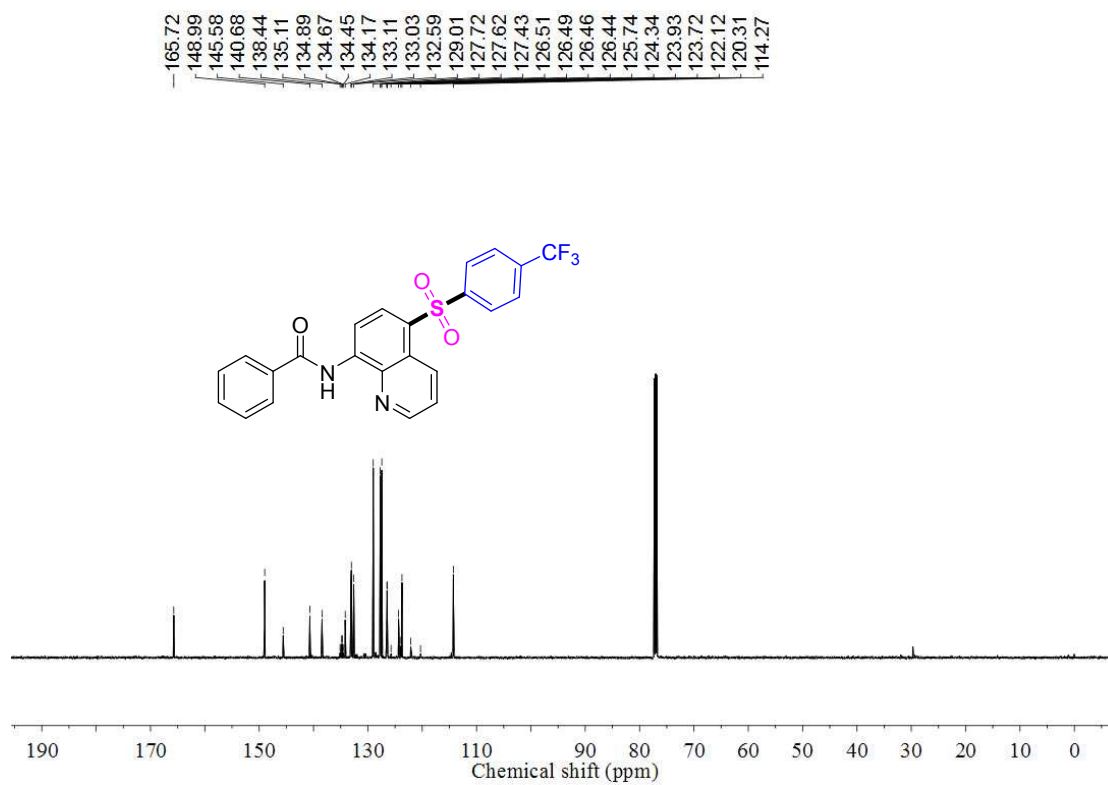

### 3h $^1\text{H}$ NMR

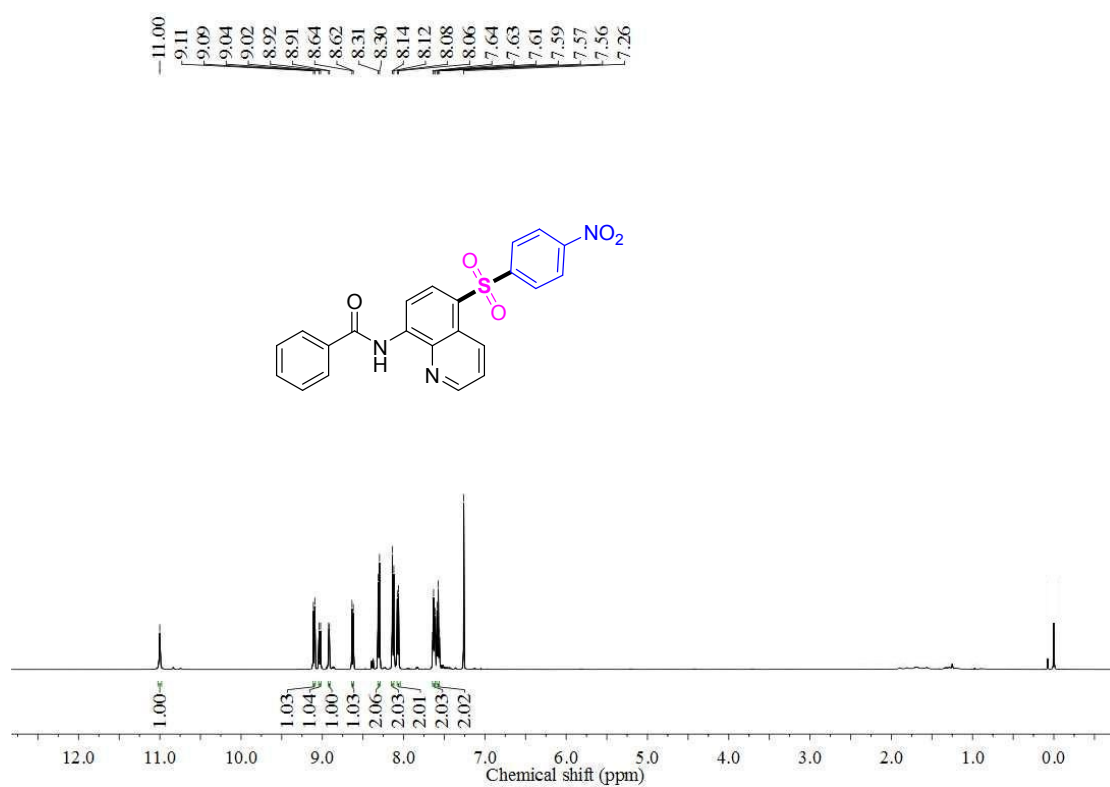

### 3h $^{13}\text{C}\{^1\text{H}\}$ NMR

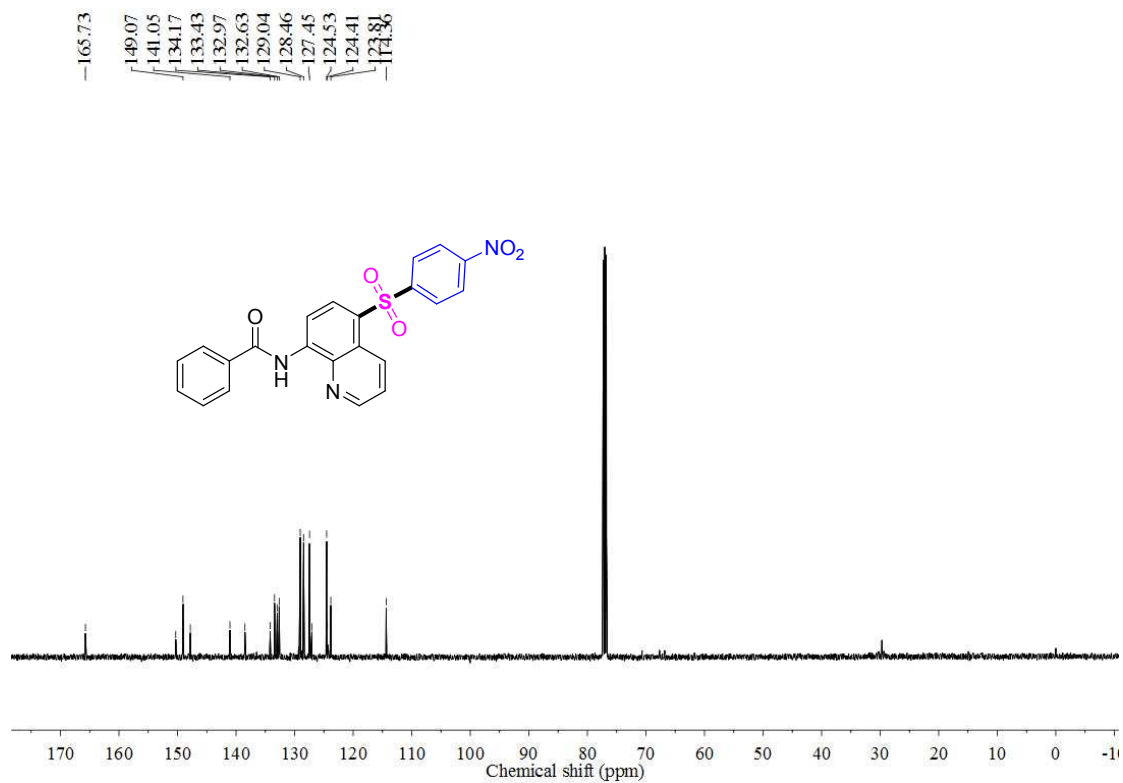

### 3i $^1\text{H}$ NMR

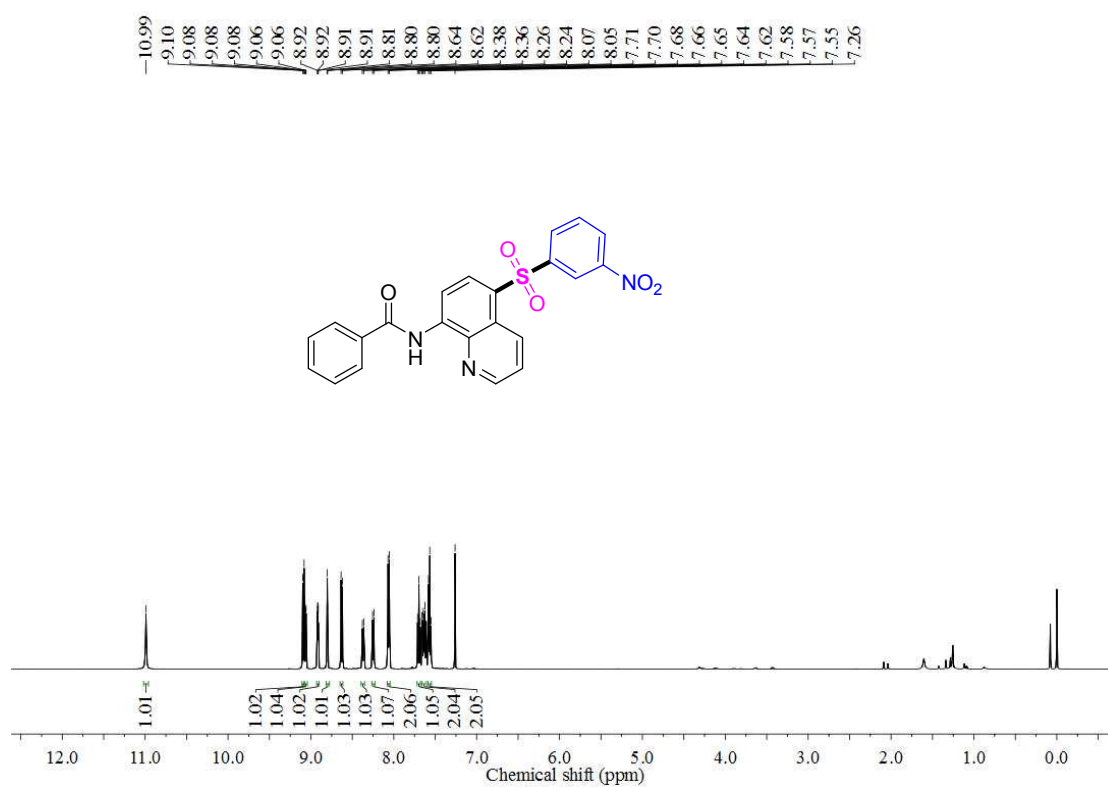

### 3i $^{13}\text{C}\{^1\text{H}\}$ NMR

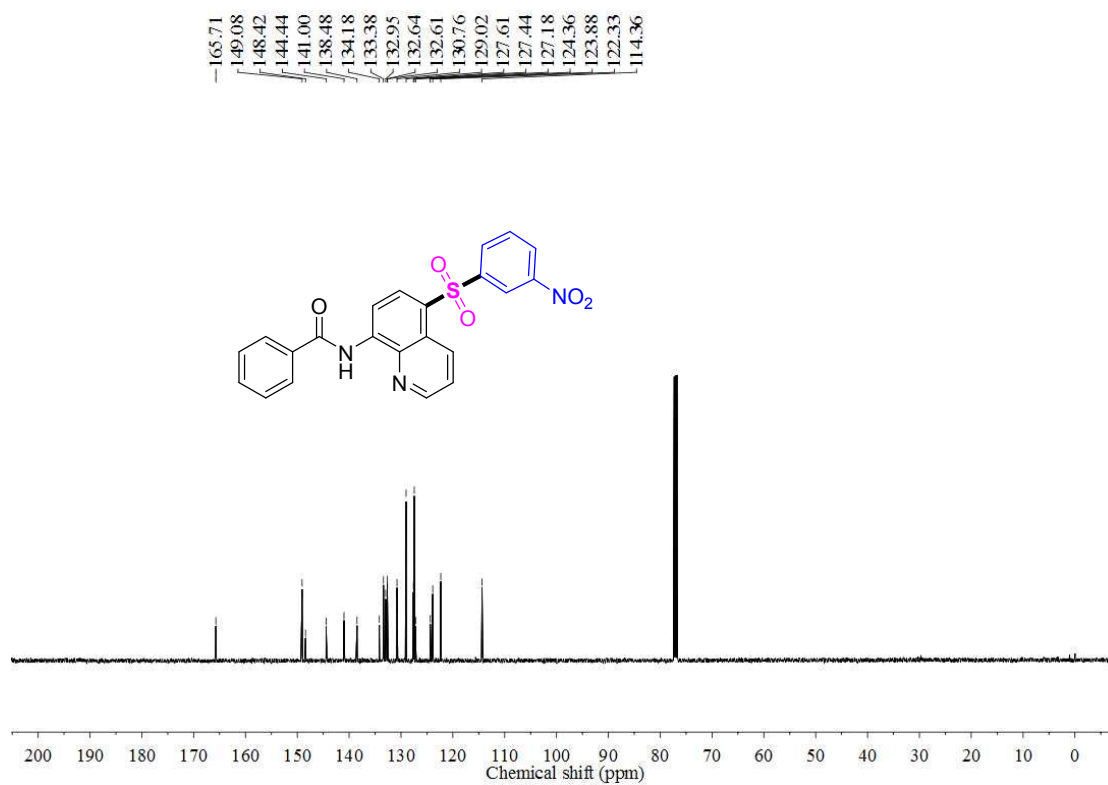

### 3j $^1\text{H}$ NMR

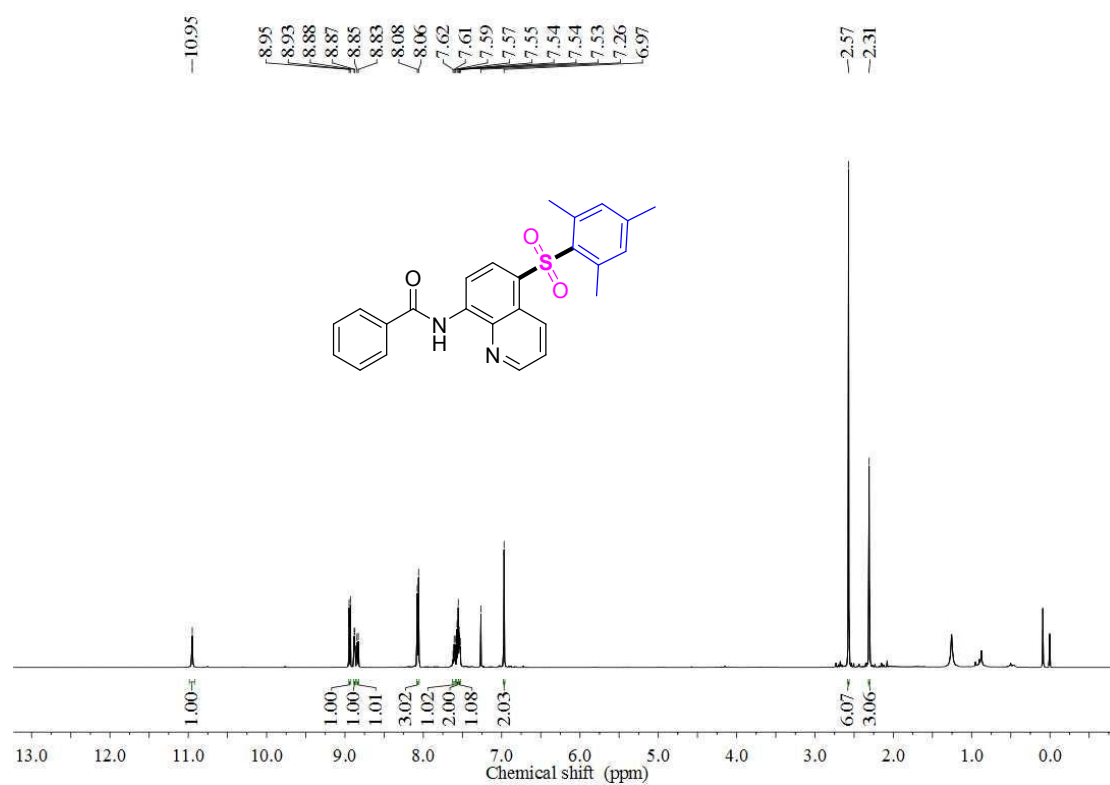

### 3j $^{13}\text{C}\{^1\text{H}\}$ NMR

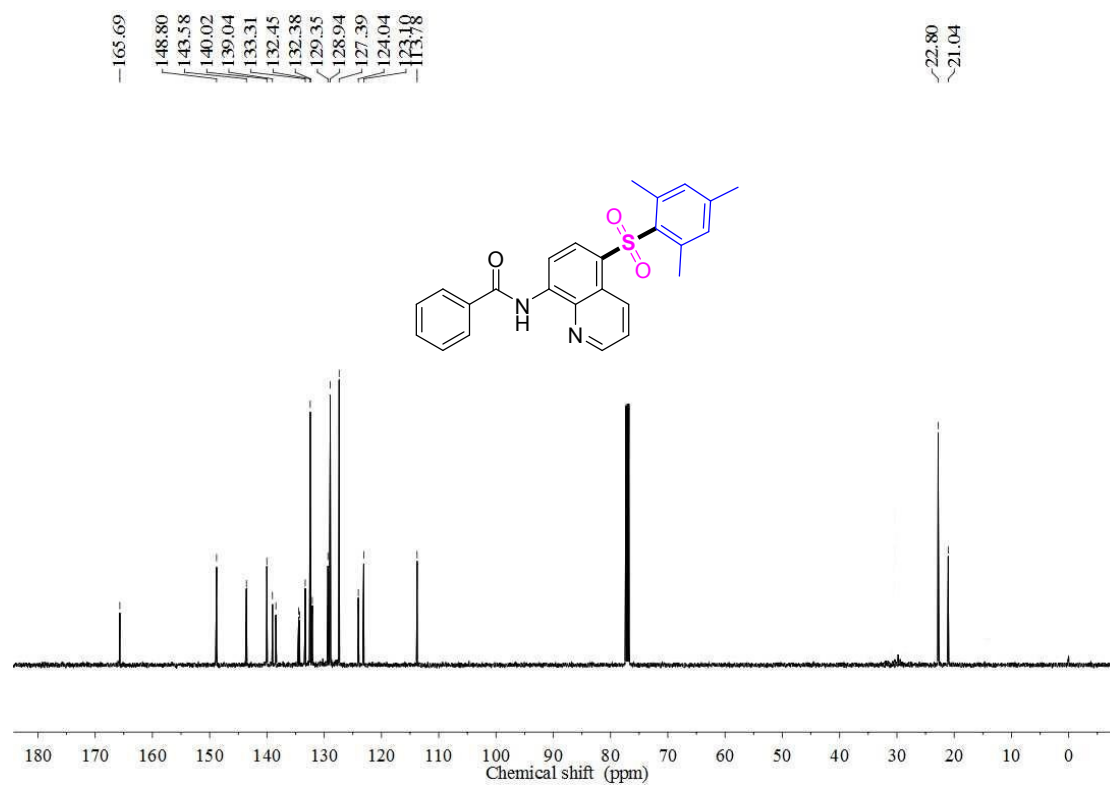

### 3k $^1\text{H}$ NMR

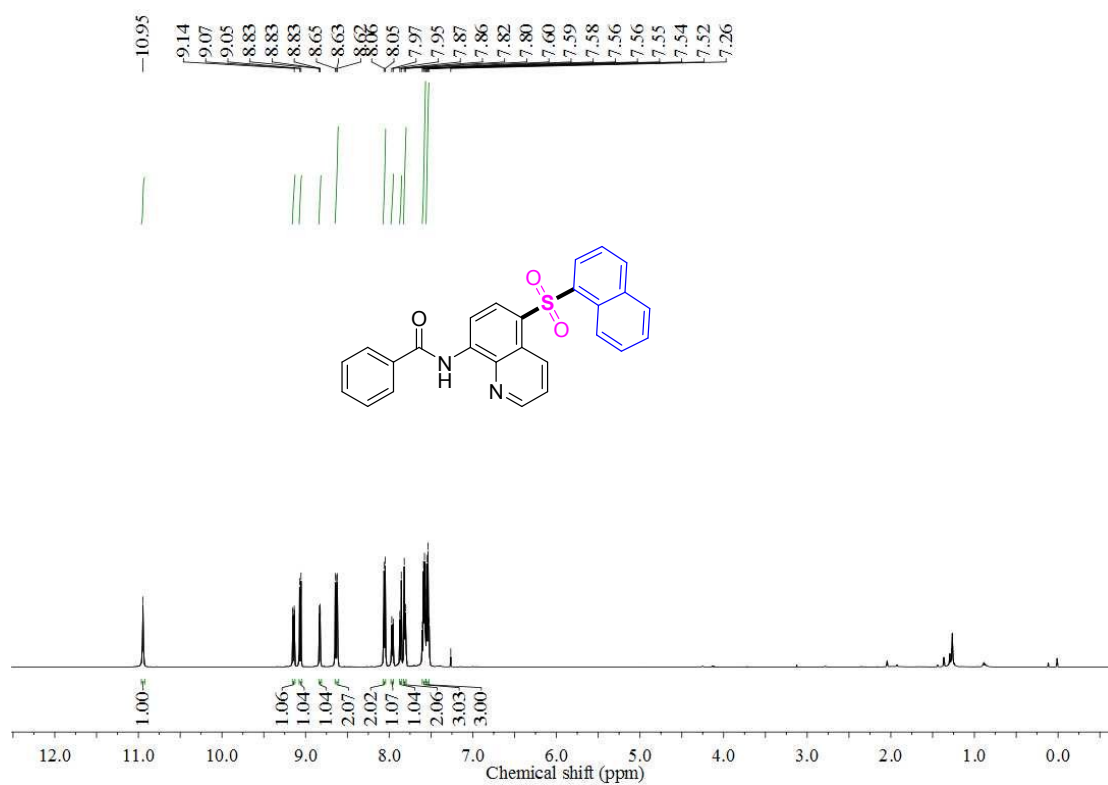

### 3k $^{13}\text{C}\{^1\text{H}\}$ NMR

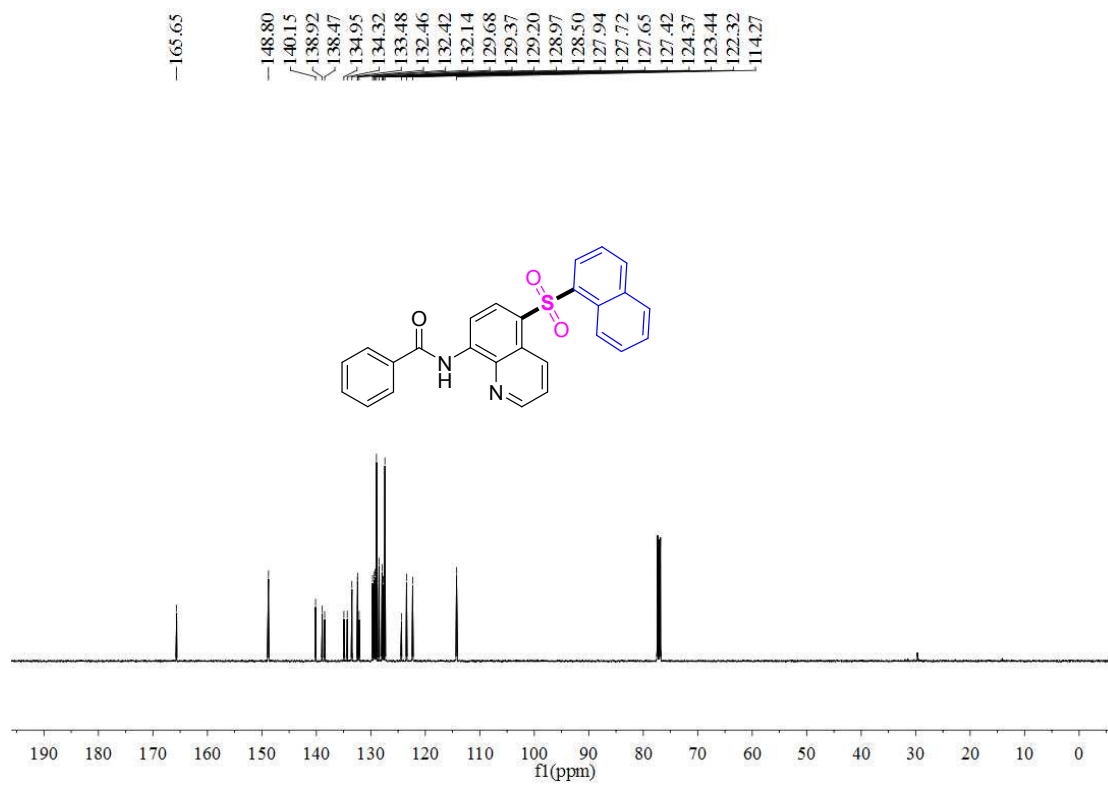

### 31 $^1\text{H}$ NMR

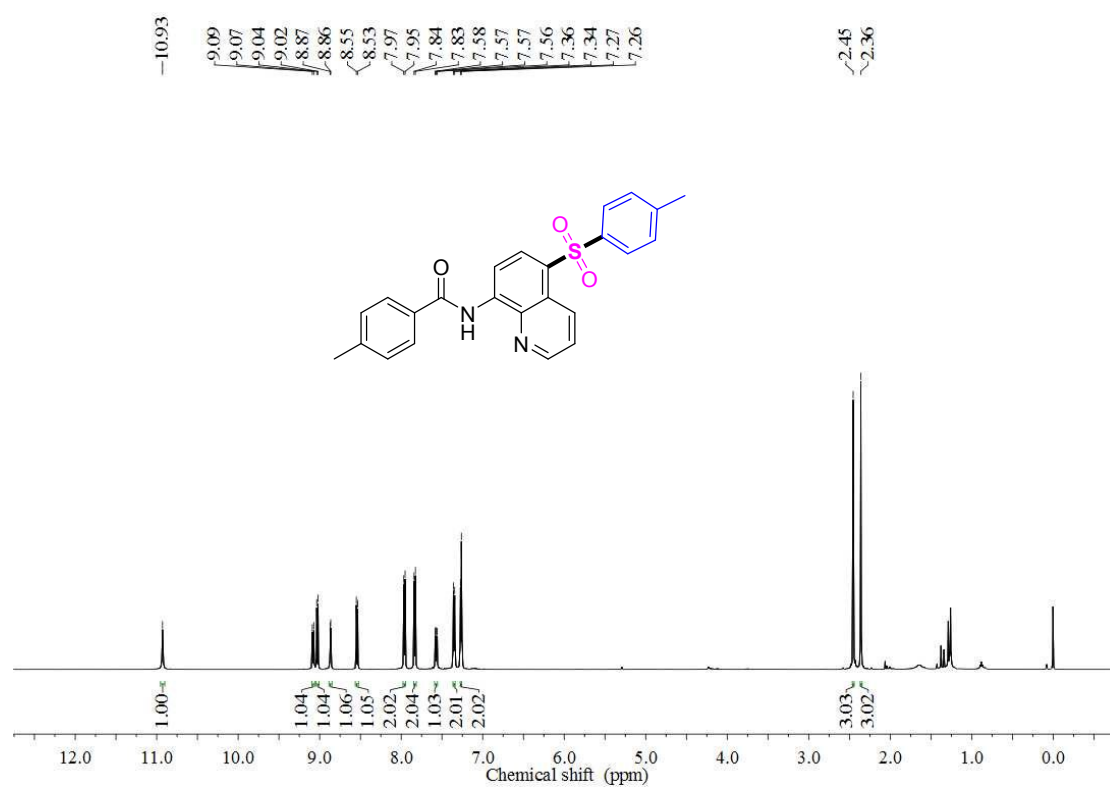

### 31 $^{13}\text{C}\{^1\text{H}\}$ NMR

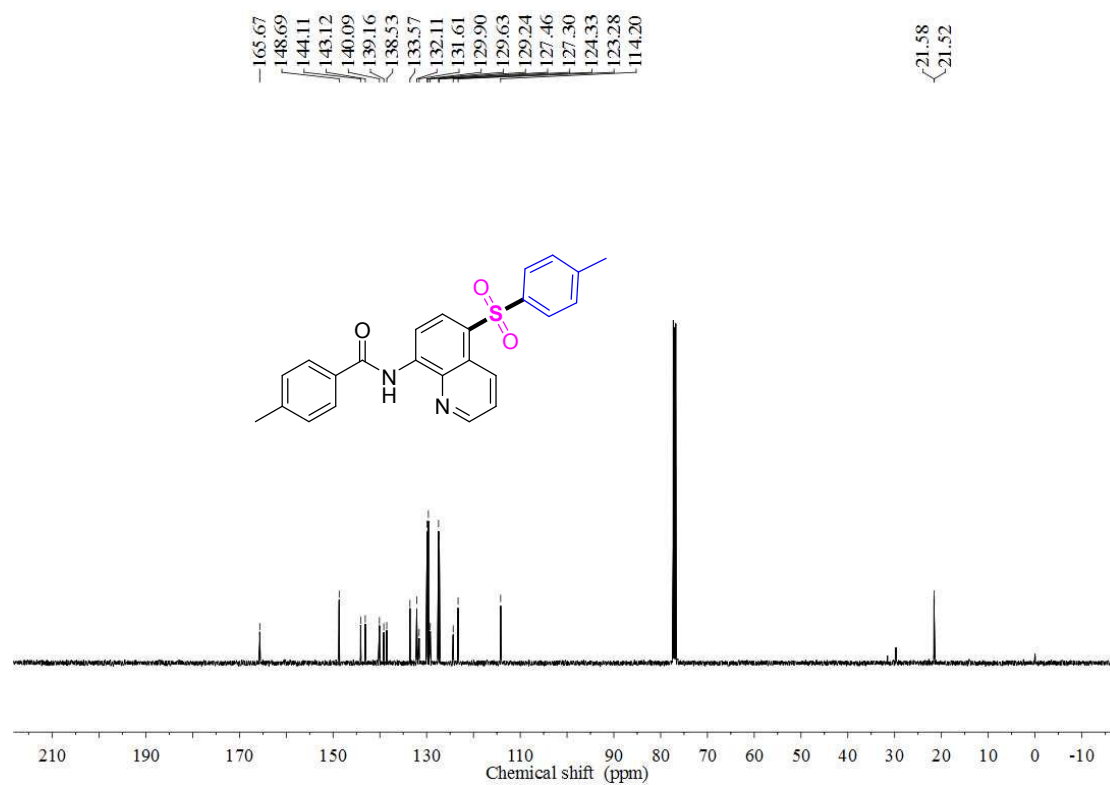

### 3m $^1\text{H}$ NMR

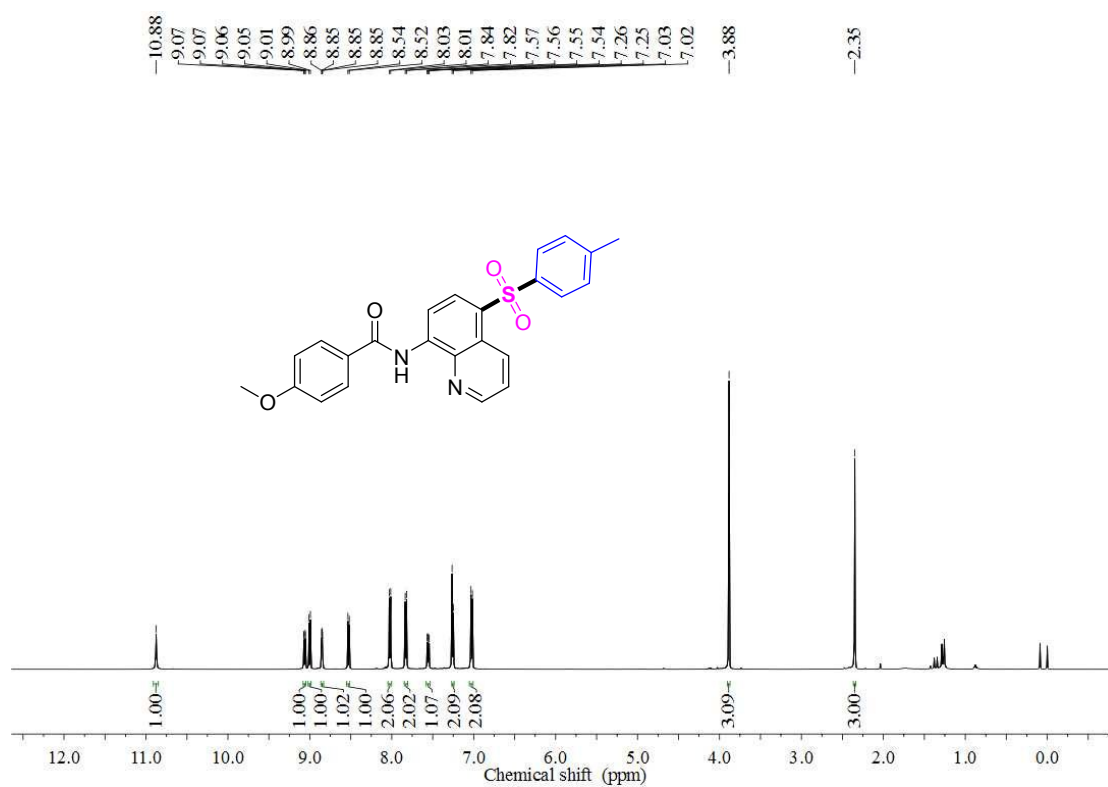

### 3m $^{13}\text{C}\{^1\text{H}\}$ NMR

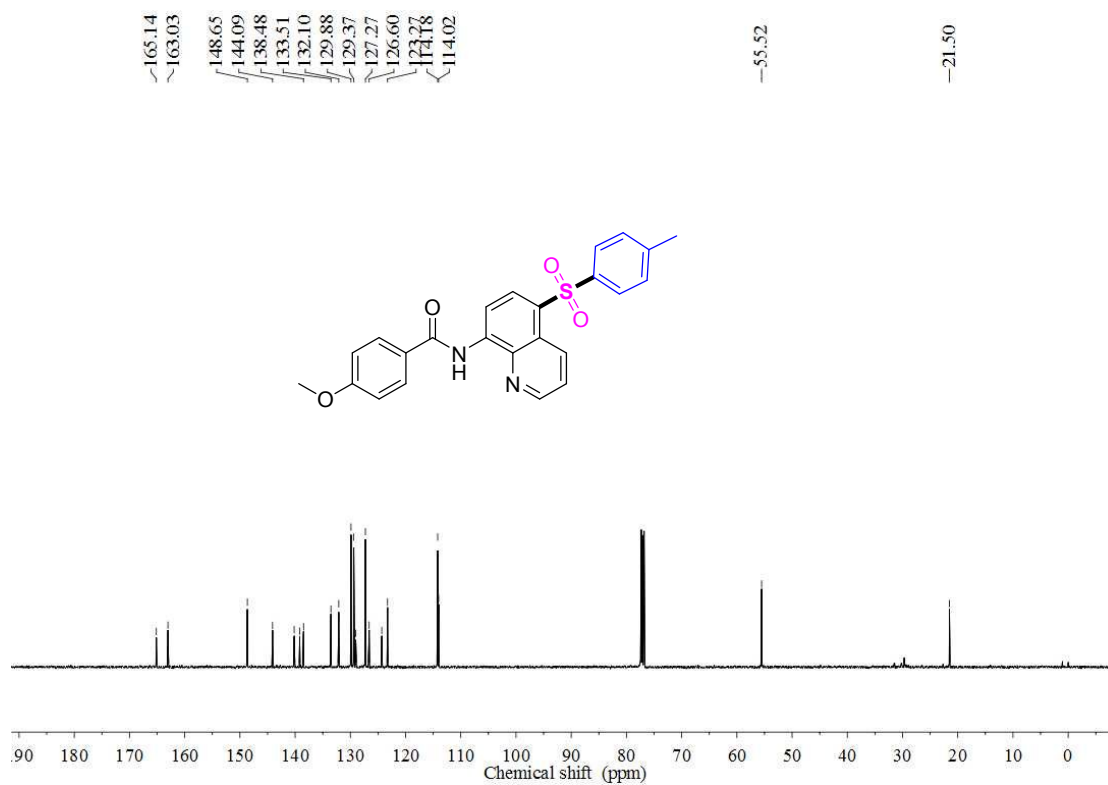

### 3n $^1\text{H}$ NMR

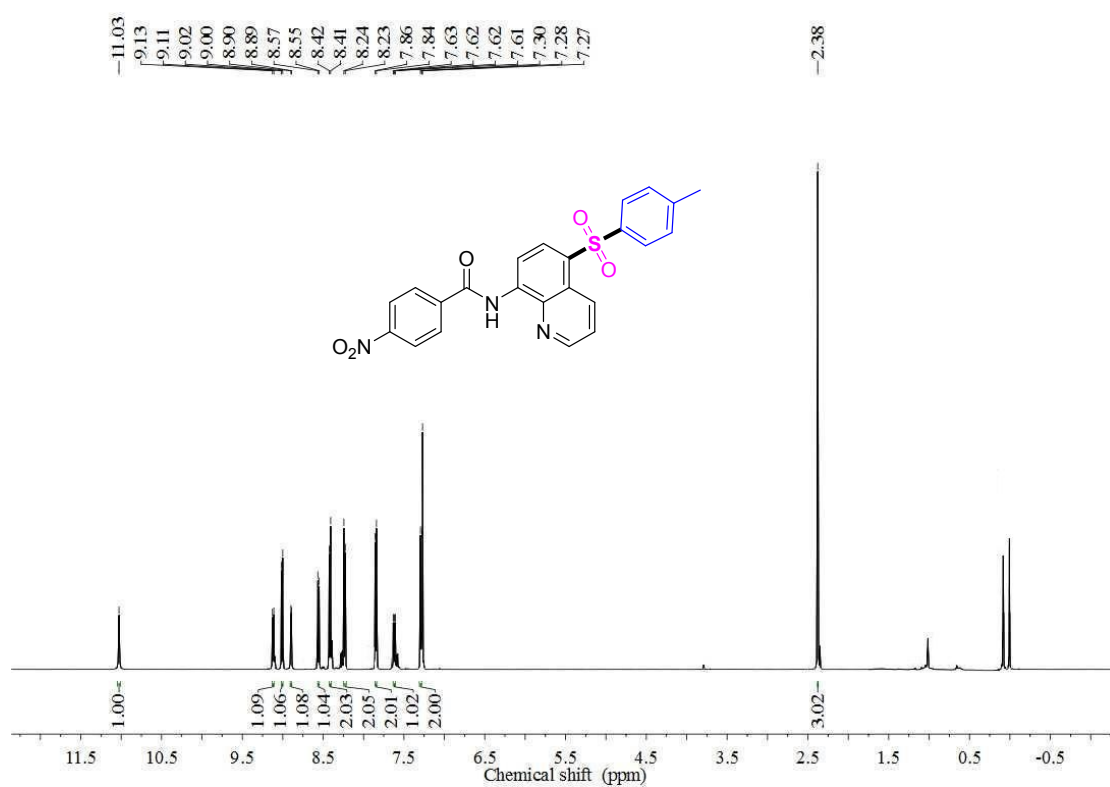

### 3n $^{13}\text{C}\{^1\text{H}\}$ NMR

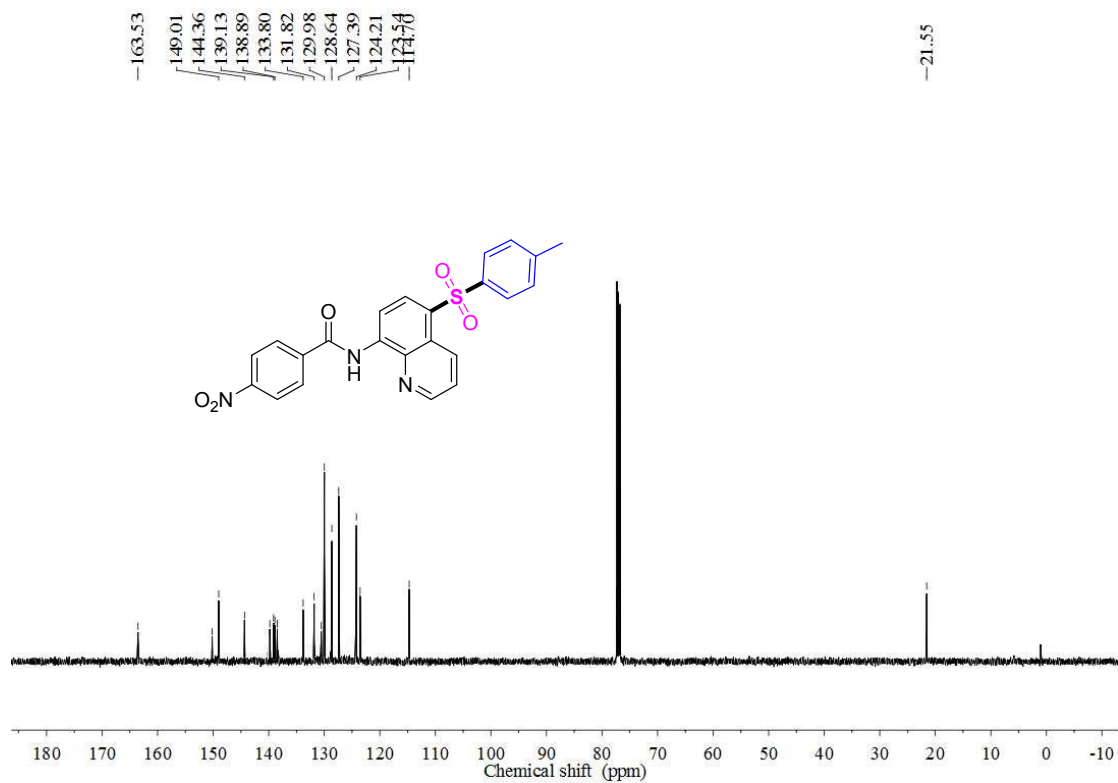



### 3o $^1\text{H}$ NMR

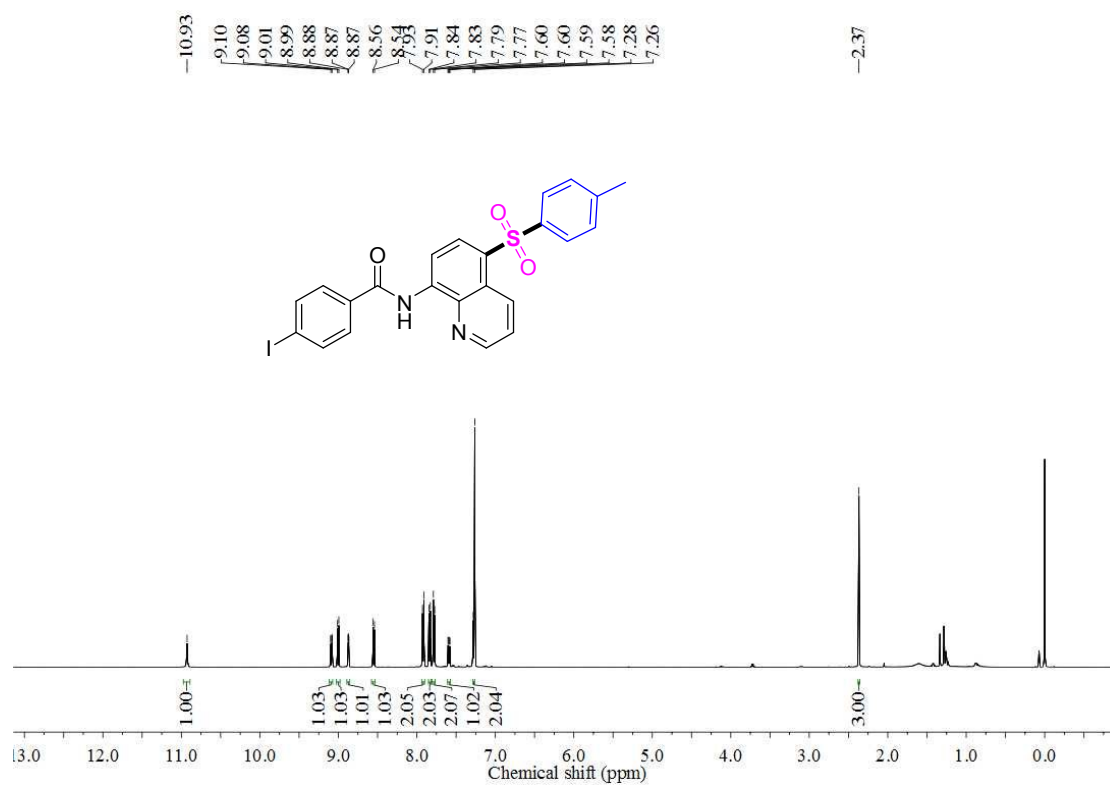

### 3o $^{13}\text{C}\{^1\text{H}\}$ NMR

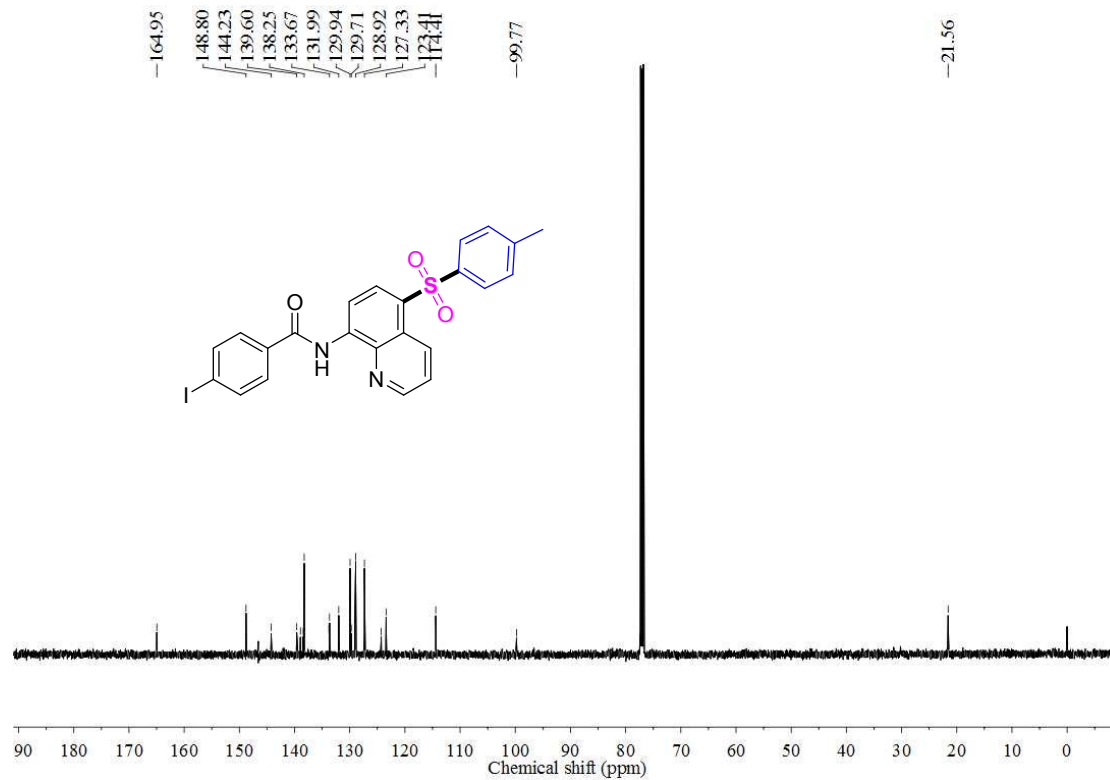

### 3p $^1\text{H}$ NMR

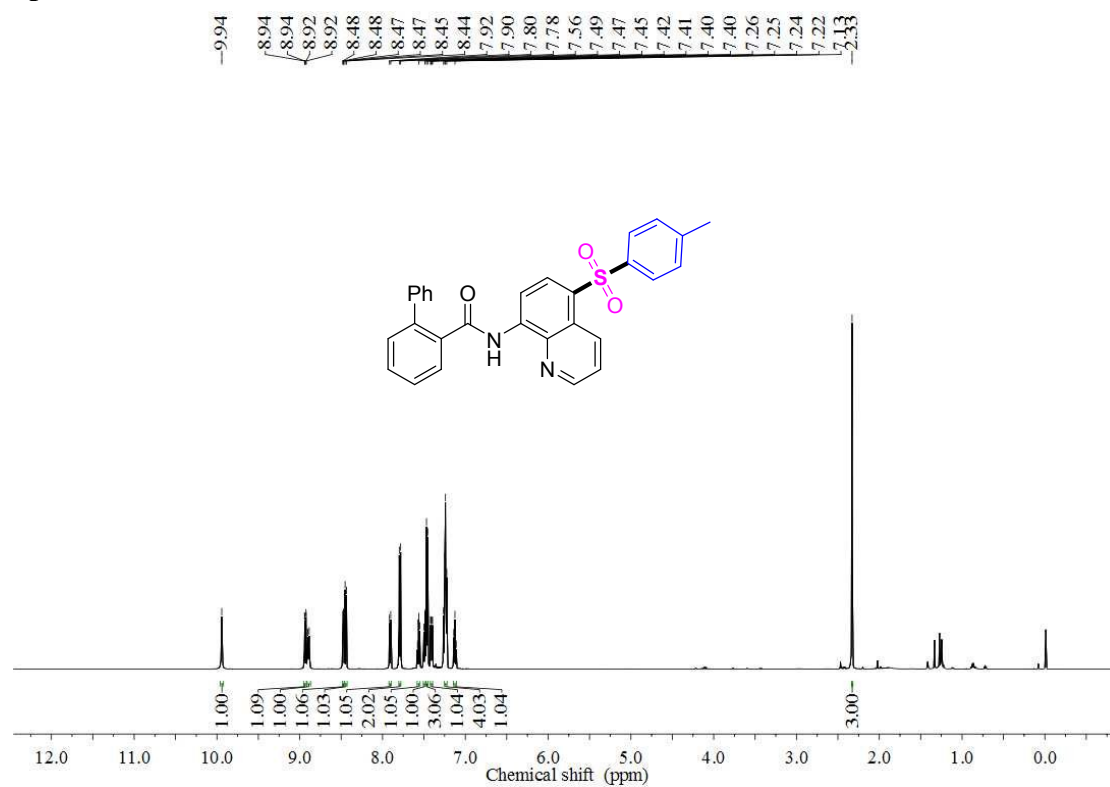

### 3p $^{13}\text{C}\{^1\text{H}\}$ NMR

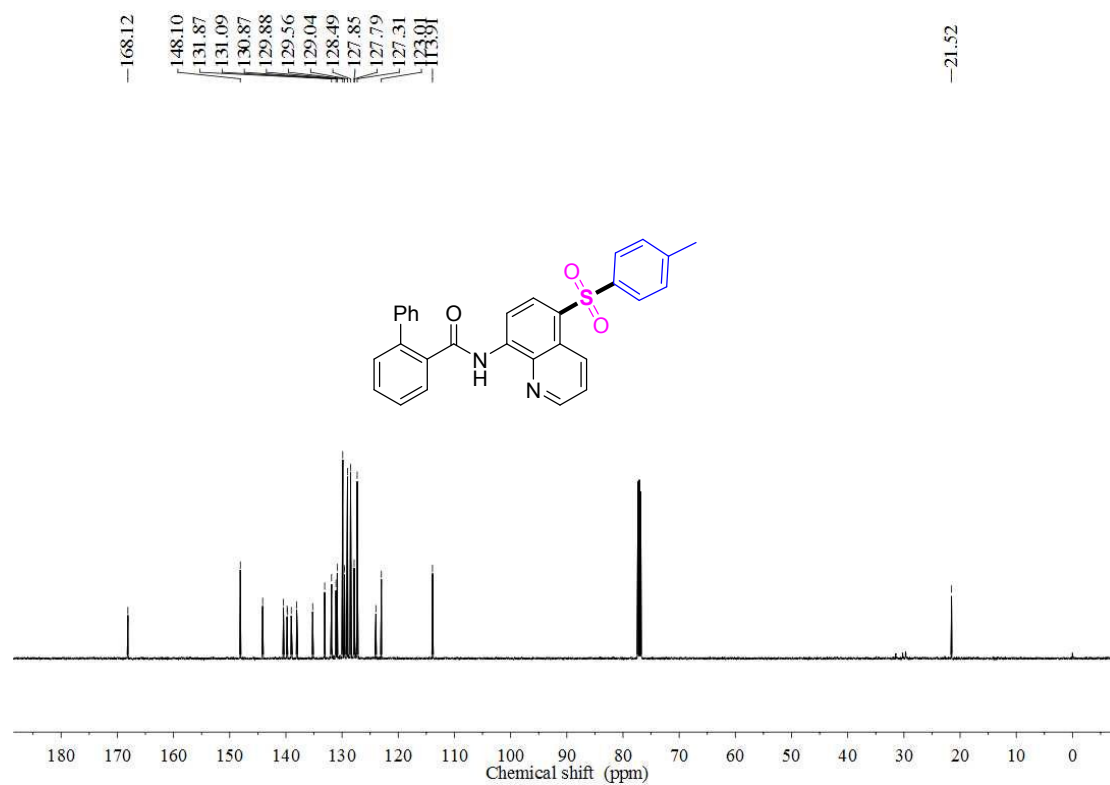

### 3q $^1\text{H}$ NMR

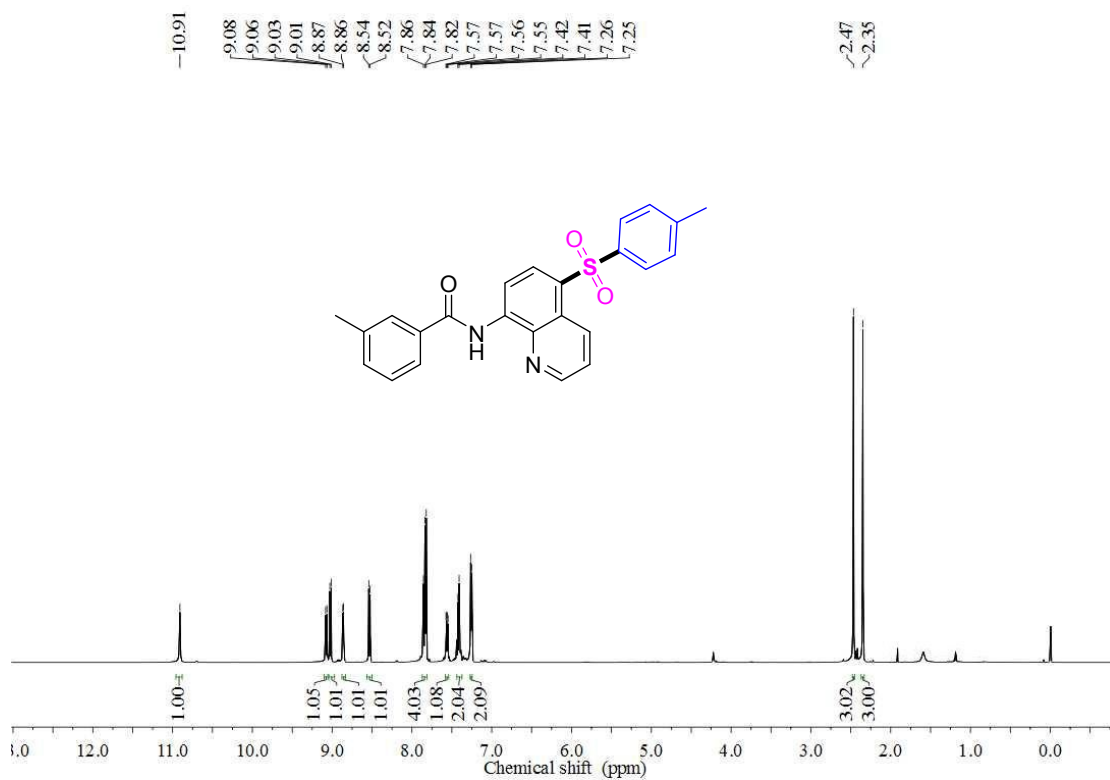

### 3q $^{13}\text{C}\{^1\text{H}\}$ NMR

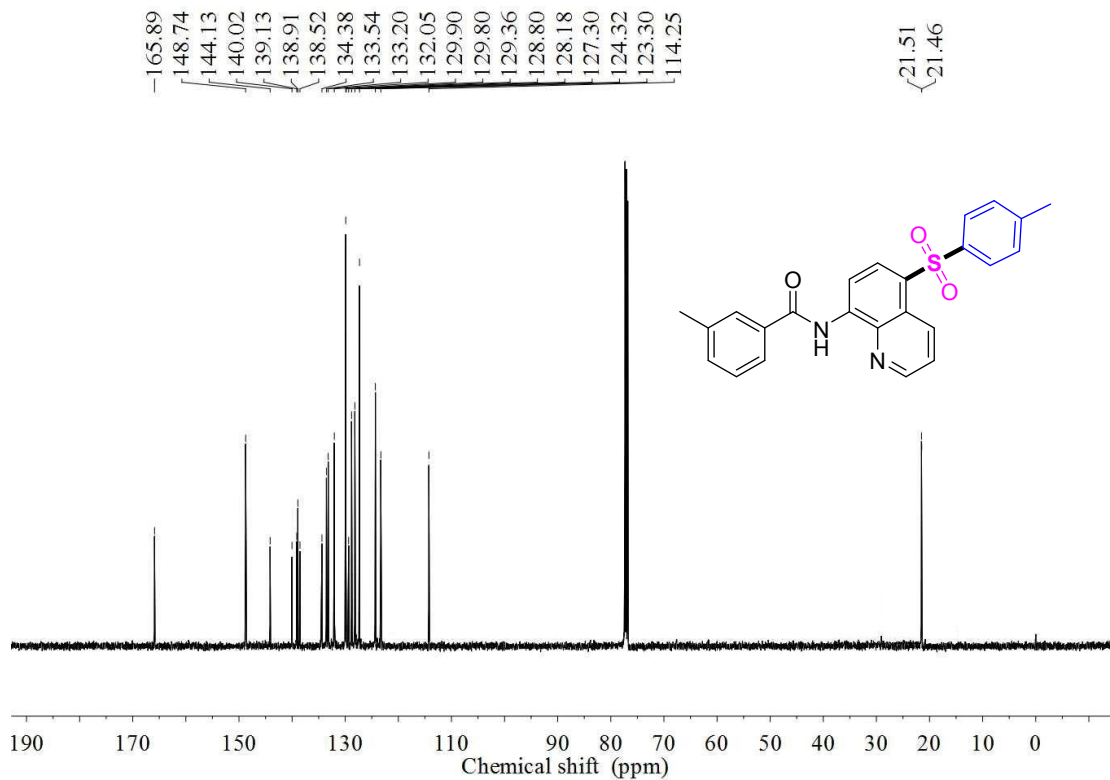

### 3r <sup>1</sup>H NMR

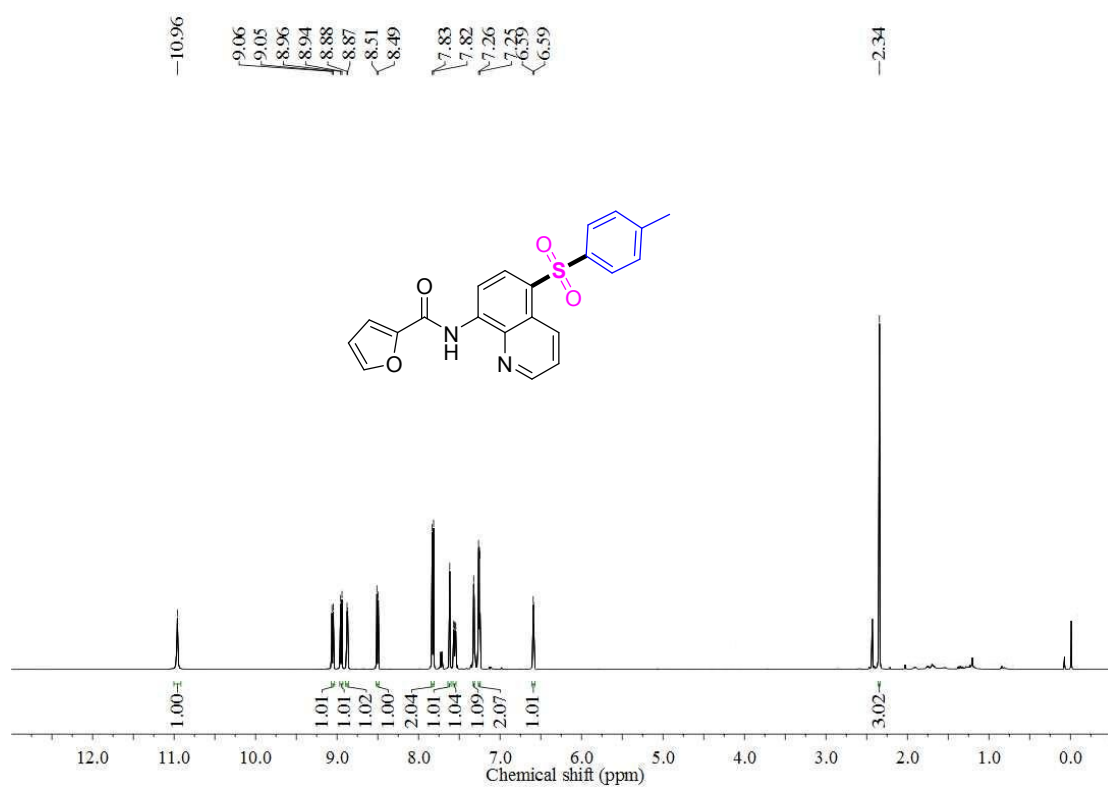

### 3r <sup>13</sup>C{<sup>1</sup>H} NMR

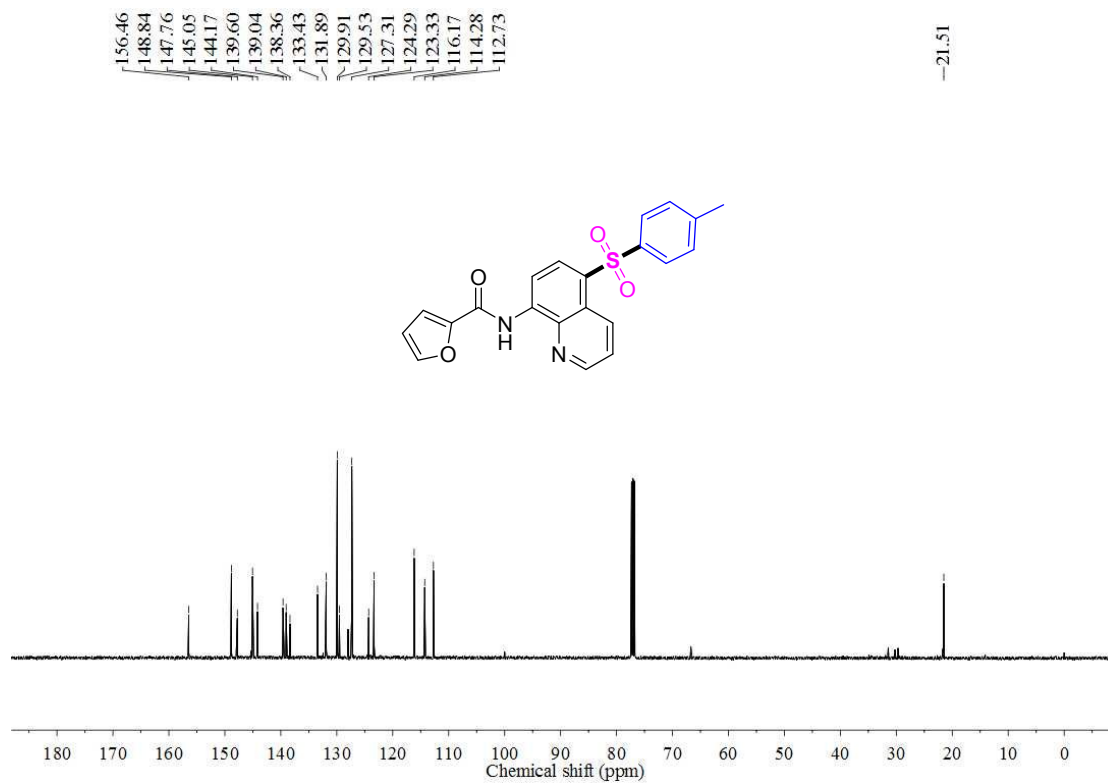

### 3s $^1\text{H}$ NMR

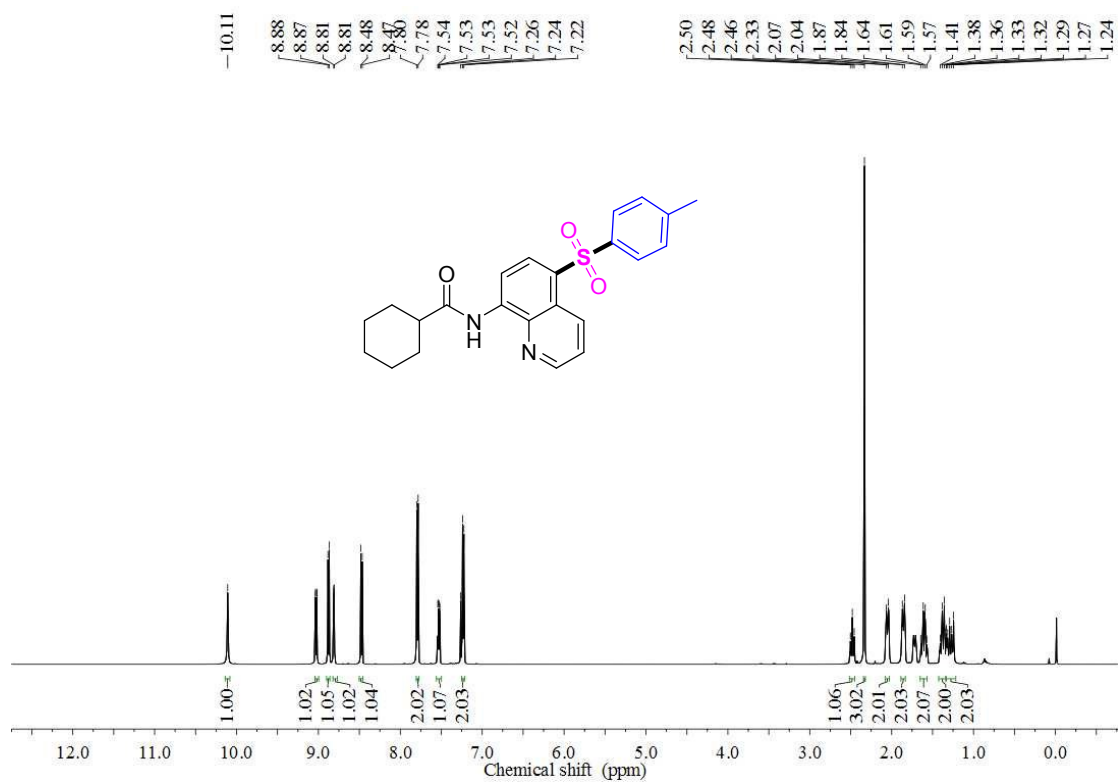

### 3s $^{13}\text{C}\{^1\text{H}\}$ NMR

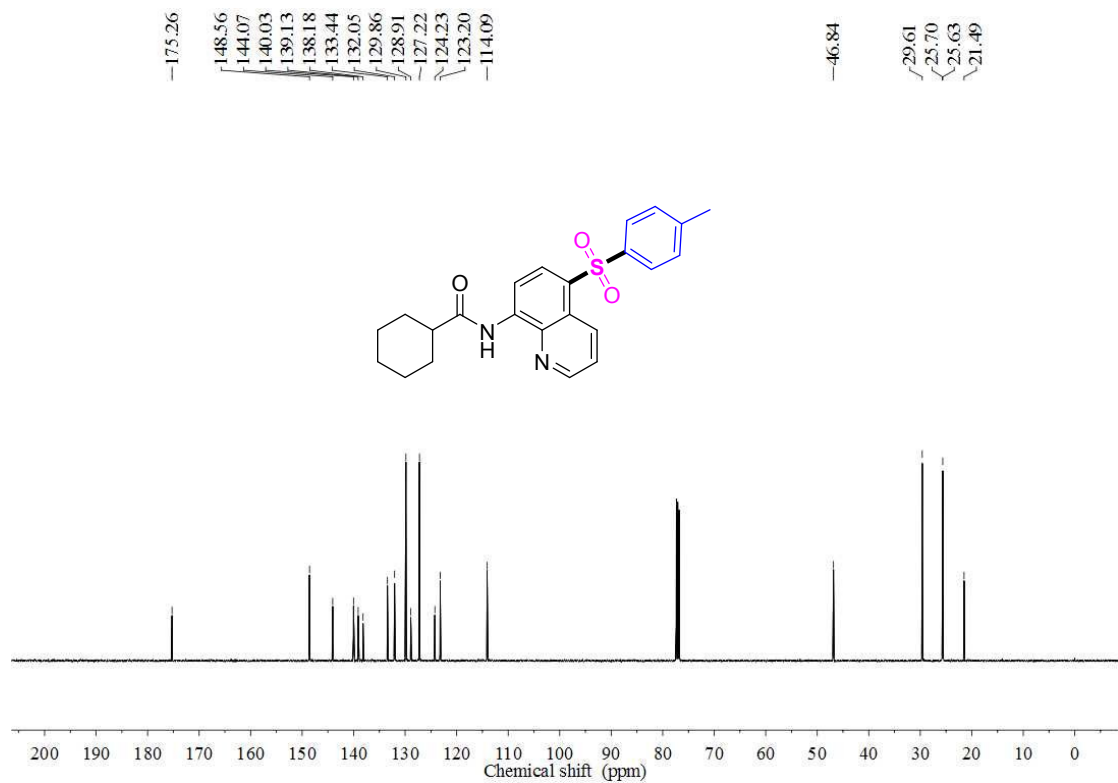

### 3t $^1\text{H}$ NMR

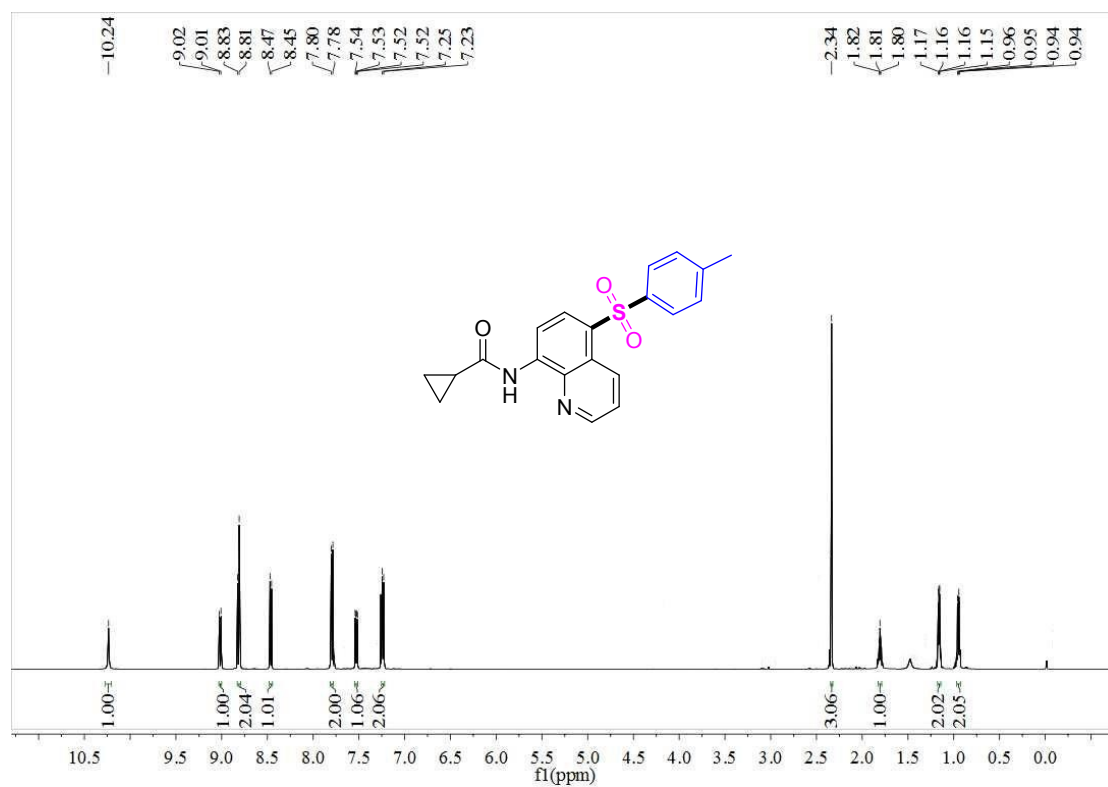

### 3t $^{13}\text{C}\{^1\text{H}\}$ NMR

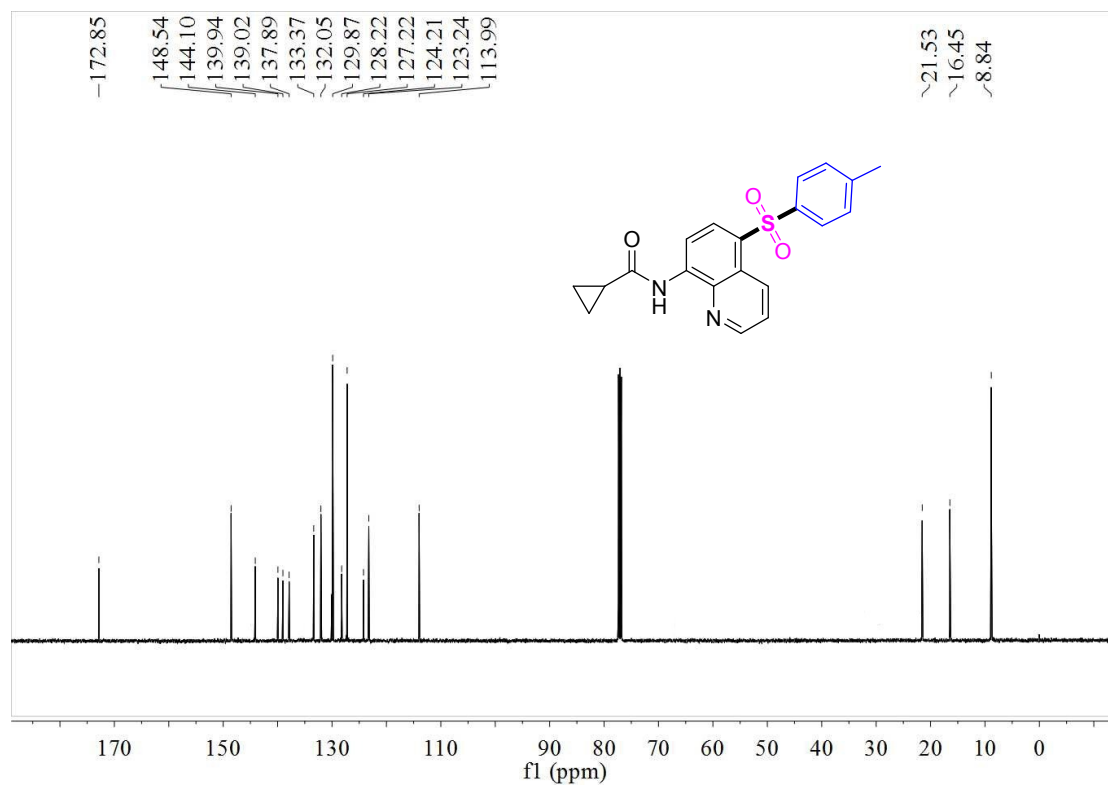

### 3u $^1\text{H}$ NMR

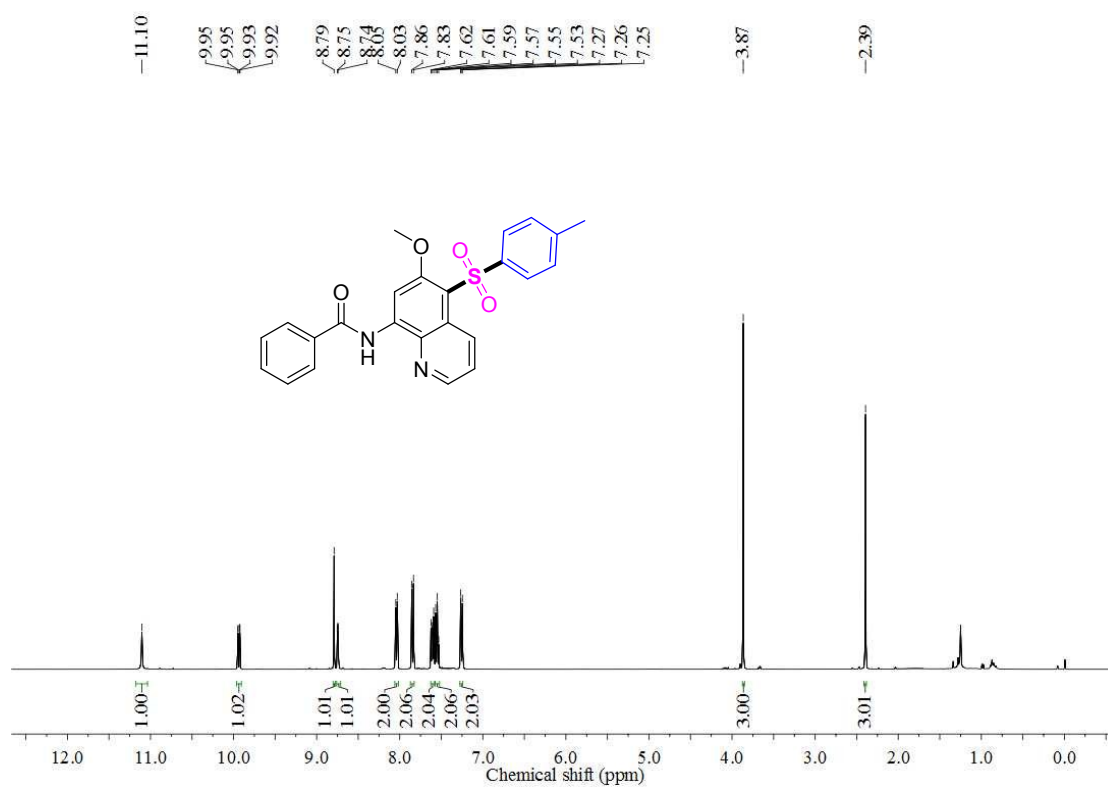

### 3u $^{13}\text{C}\{^1\text{H}\}$ NMR

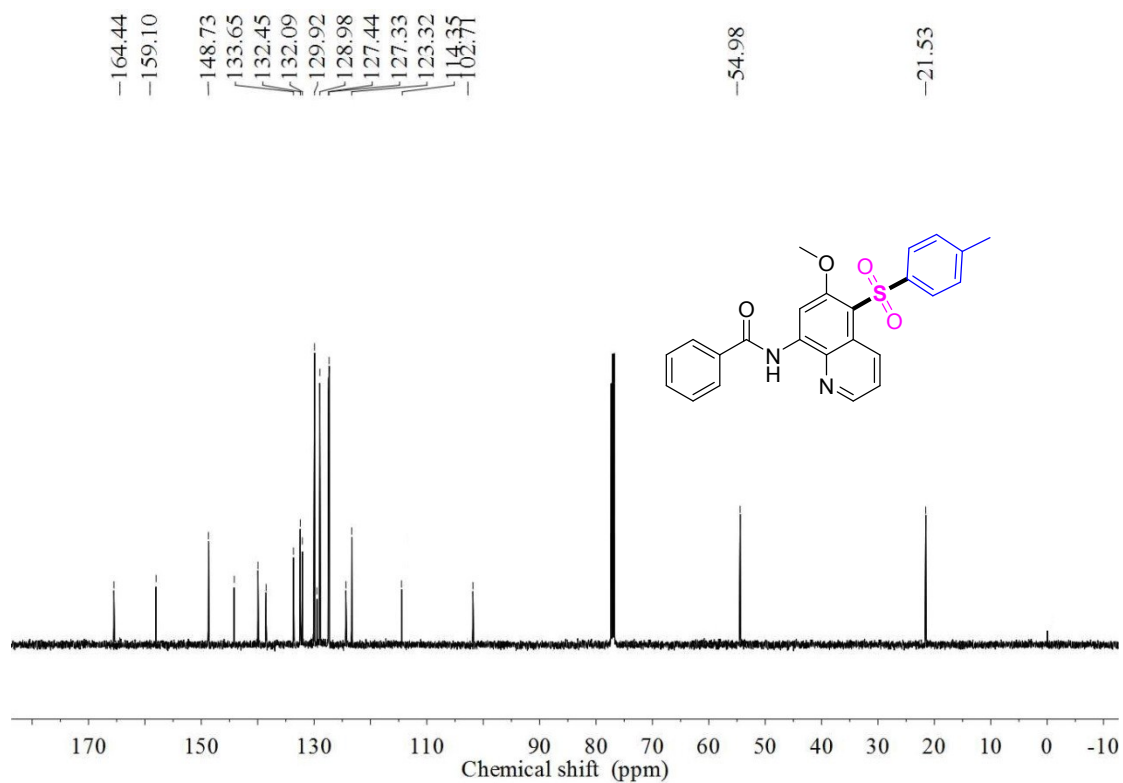

### 3v $^1\text{H}$ NMR

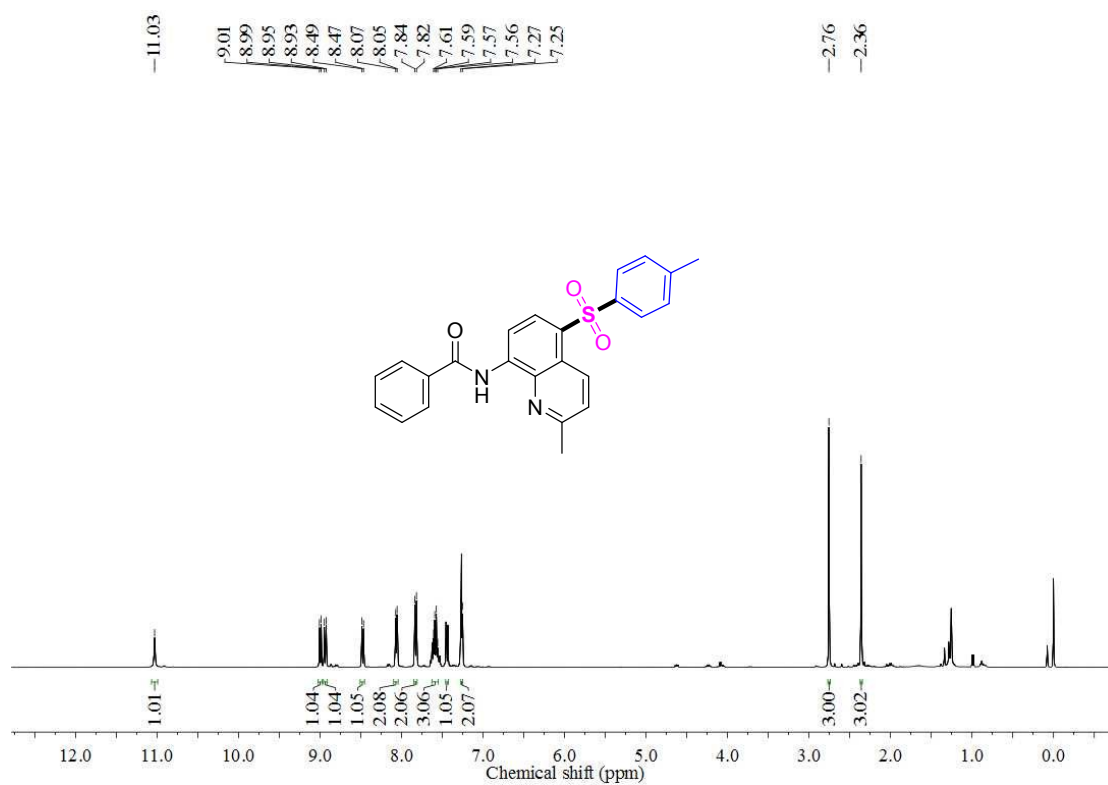

### 3v $^{13}\text{C}\{^1\text{H}\}$ NMR

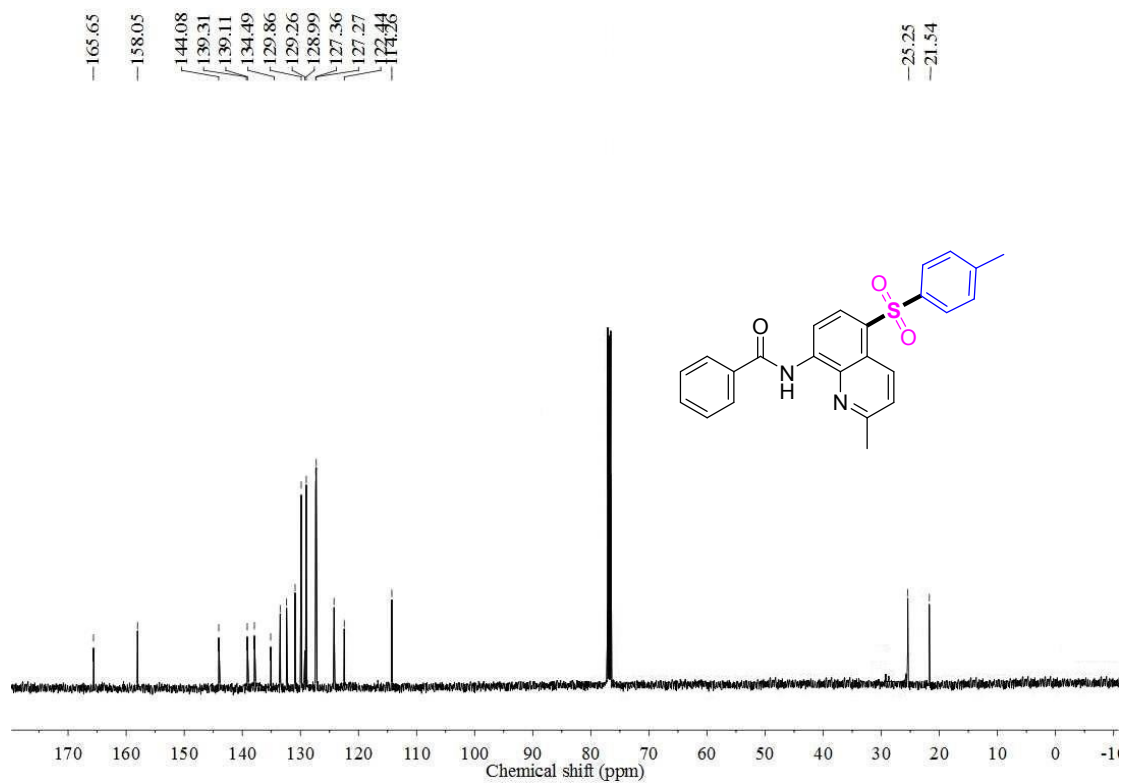



### 3w $^1\text{H}$ NMR

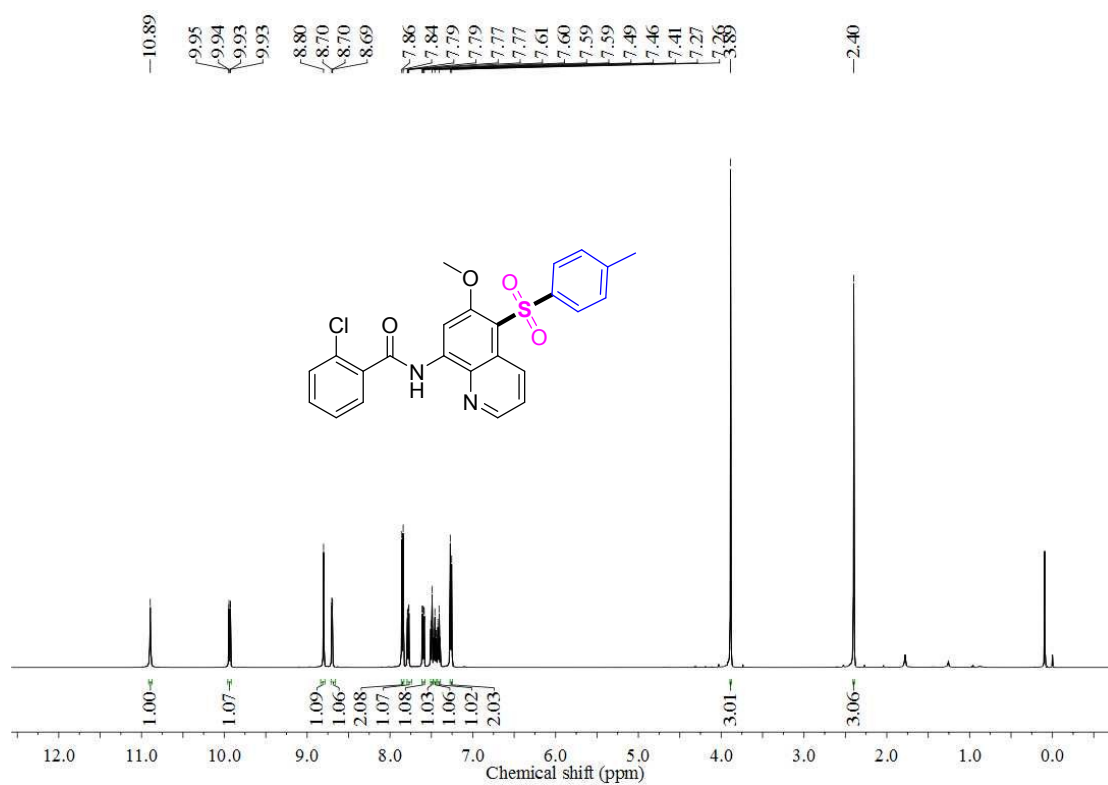

### 3w $^{13}\text{C}\{^1\text{H}\}$ NMR

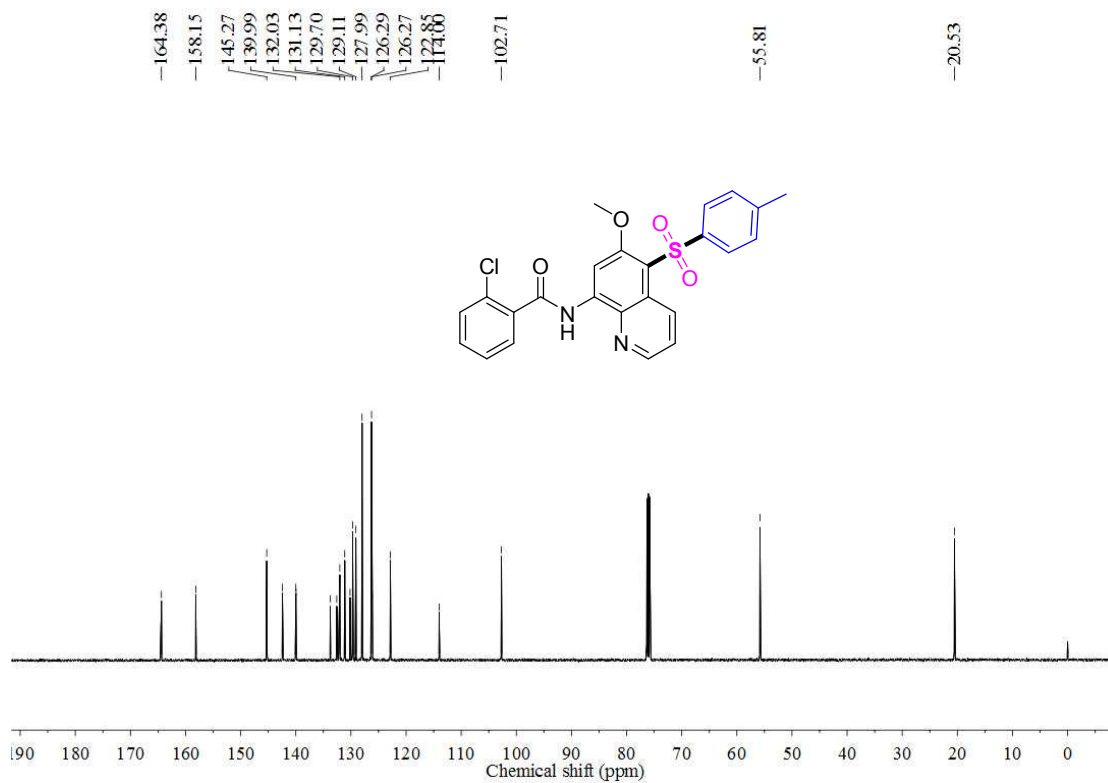

### 3x $^1\text{H}$ NMR

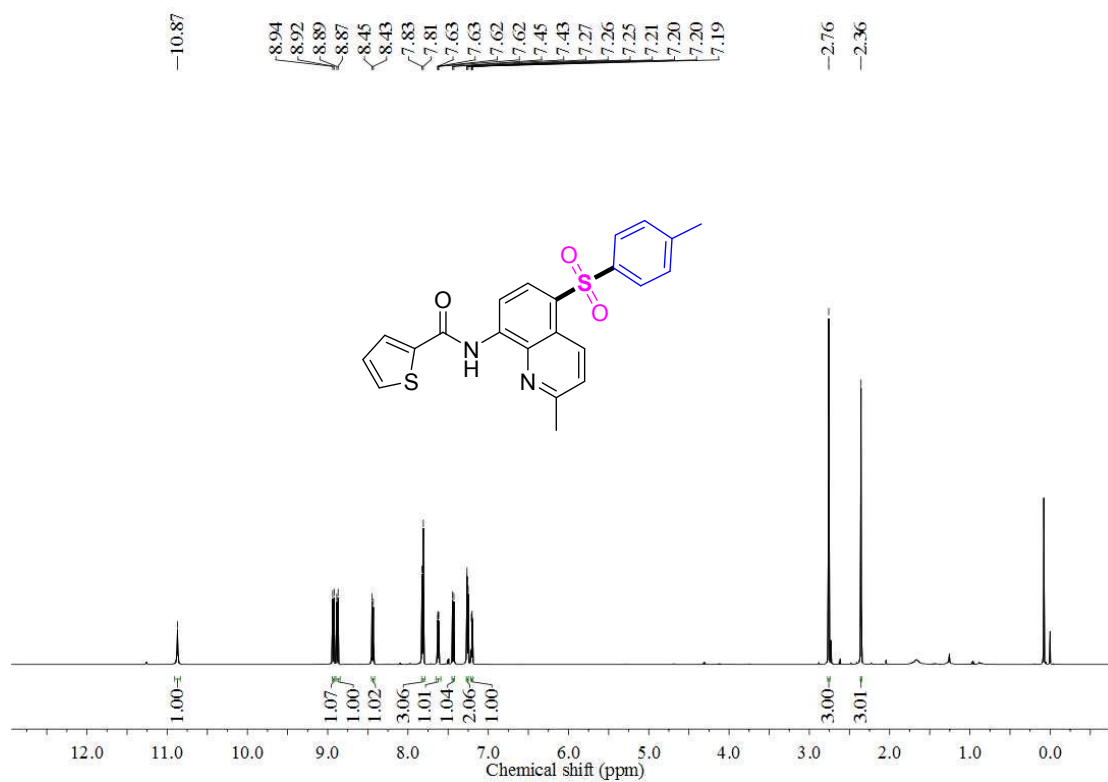

### 3x $^{13}\text{C}\{^1\text{H}\}$ NMR

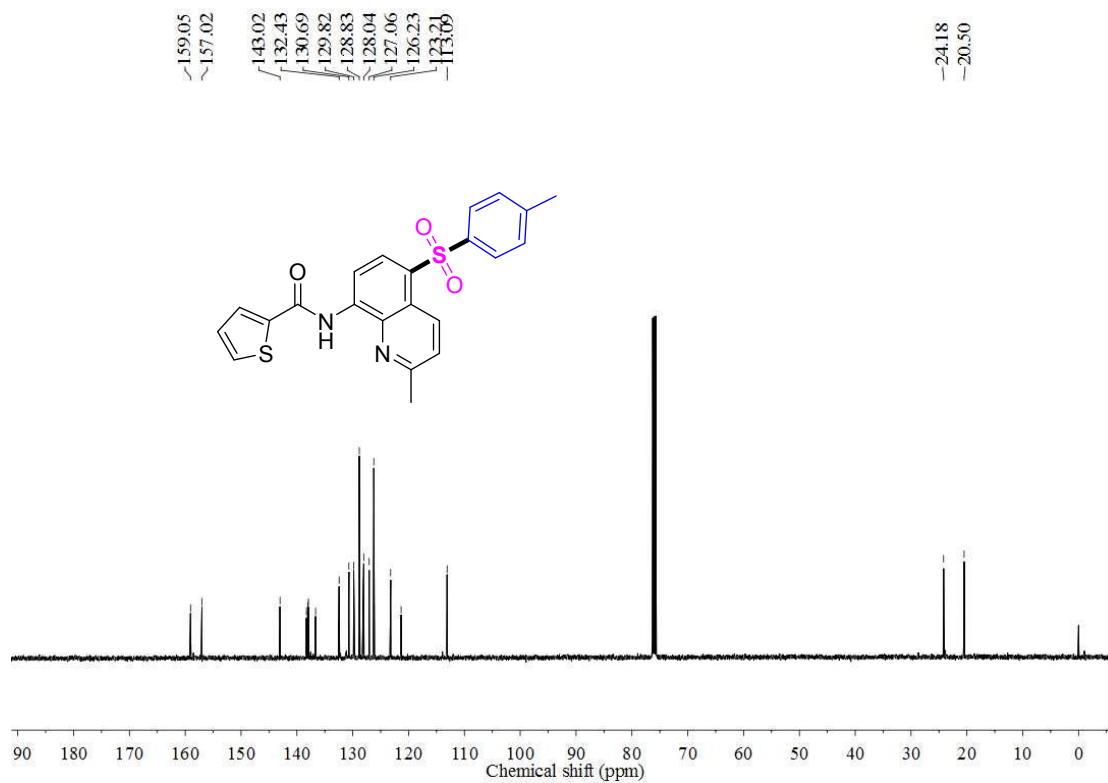

**4a**  $^1\text{H}$  NMR

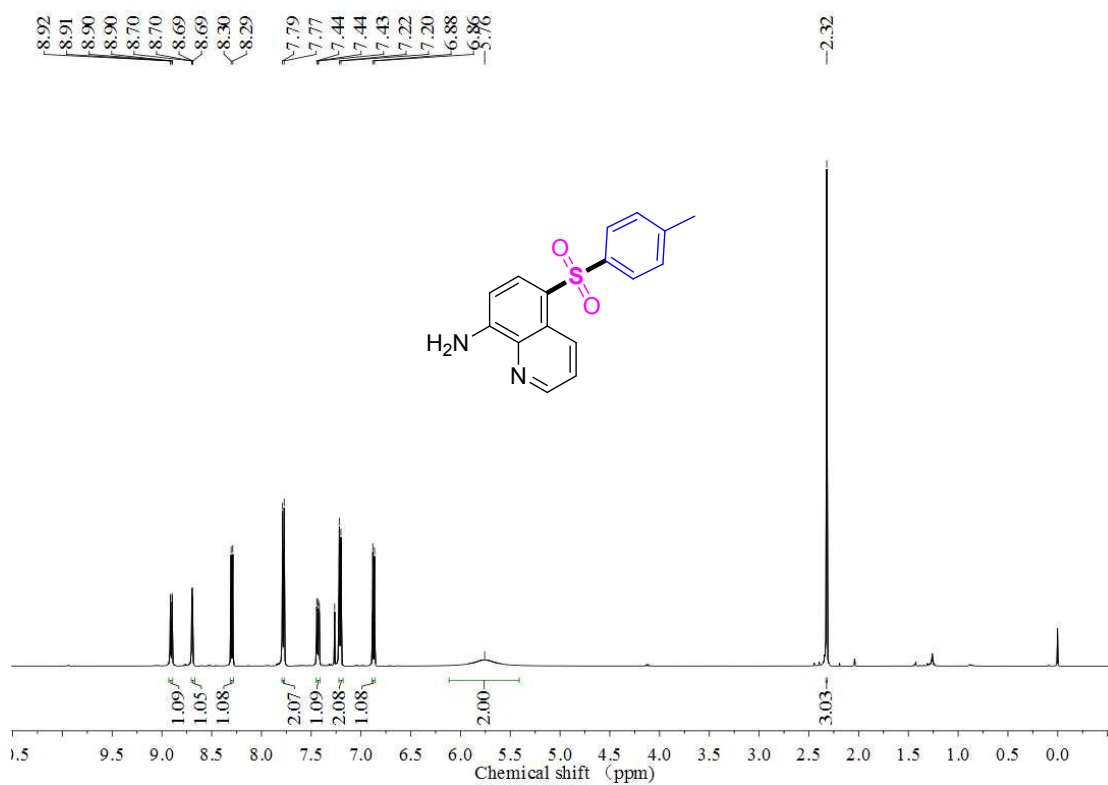

**4a**  $^{13}\text{C}\{^1\text{H}\}$  NMR

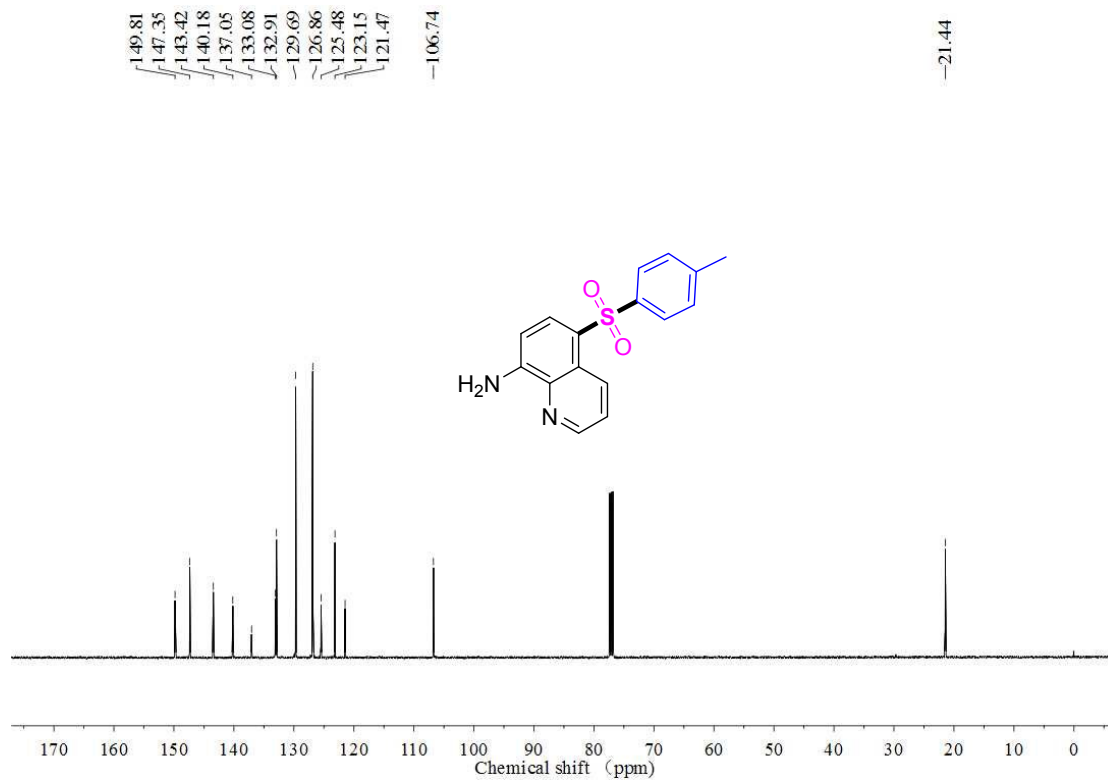

# 7 <sup>1</sup>H NMR

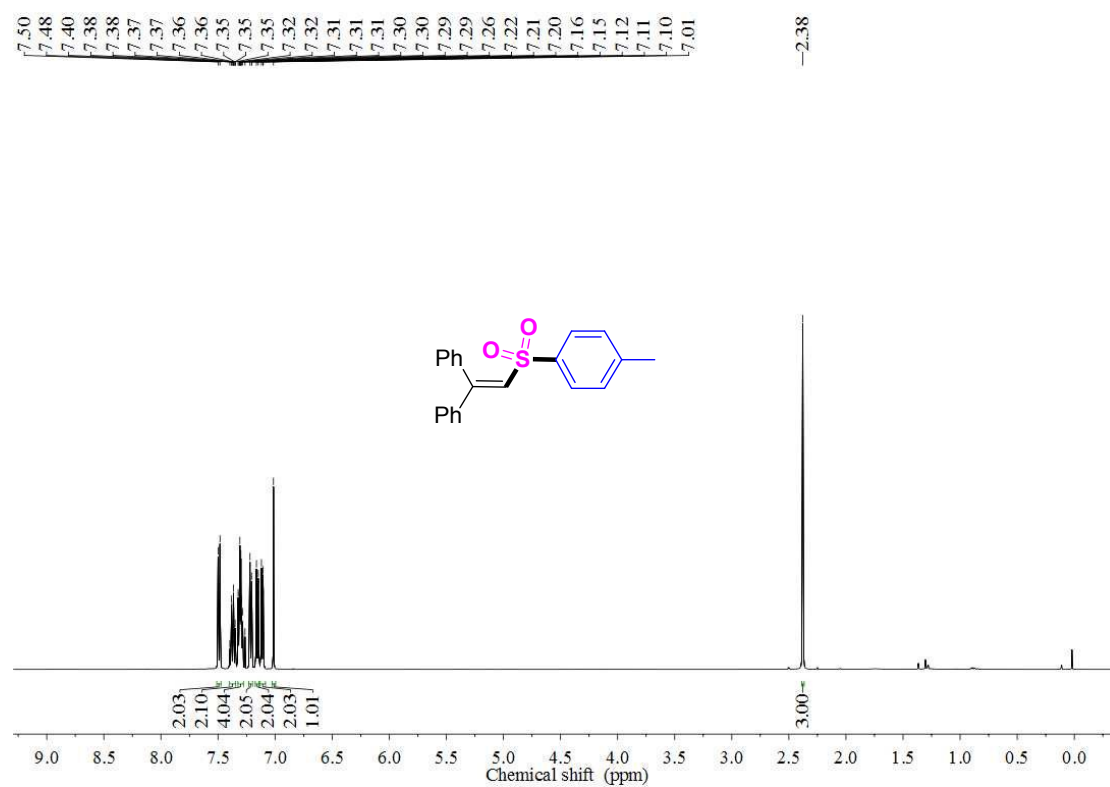

Supplement: c7ra11363c1.pdf [file c7ra11363c1.pdf]
